1           **Visualizing pyrazinamide action by live single cell**  
2 **imaging of phagosome acidification and *Mycobacterium***  
3 ***tuberculosis* pH homeostasis**

4  
5  
6 Pierre Santucci<sup>1\*</sup>, Beren Aylan<sup>1</sup>, Laure Botella<sup>1</sup>, Elliott M. Bernard<sup>1#</sup>, Claudio Bussi<sup>1</sup>, Enrica  
7 Pellegrino<sup>1</sup>, Natalia Athanasiadi<sup>1</sup> and Maximiliano G. Gutierrez<sup>1\*§</sup>

8  
9 **Affiliations:**

10 <sup>1</sup> Host-Pathogen Interactions in Tuberculosis Laboratory, The Francis Crick Institute,  
11 1 Midland Road, London, NW1 1AT, United Kingdom.

12 # Present Address: Department of Biochemistry, University of Lausanne, 1066 Epalinges,  
13 Switzerland

14 \* Correspondence to: [pierre.santucci@crick.ac.uk](mailto:pierre.santucci@crick.ac.uk) (PS), [max.g@crick.ac.uk](mailto:max.g@crick.ac.uk) (MGG)

15 § Lead contact

16  
17 **Keywords:** Tuberculosis, Microenvironments, Antibiotics, Intracellular Pharmacokinetics,  
18 Human Macrophages.

19  
20 **Abbreviations:**

21 tuberculosis (TB); *Mycobacterium tuberculosis* (Mtb); rifampicin (RIF); isoniazid (INH);  
22 ethambutol (EMB), pyrazinamide (PZA); total pyrazinoic acid (POA); pyrazinoate anion  
23 (POA<sup>(-)</sup>), neutral protonated pyrazinoic acid (HPOA); correlative light, electron, ion  
24 microscopy (CLEIM); human monocyte-derived macrophages (MDM); human induced  
25 pluripotent stem cells (iPSC), human induced pluripotent stem cell-derived macrophages  
26 (iPSDM), Concanamycin A (ConA); mycobacterial region of interest (mROI); half maximal

27 effective concentration (EC<sub>50</sub>); bedaquiline (BDQ); *Mycobacterium bovis* (Mbv), multiplicity of  
28 infection (MOI).

29

## 30 **Highlights**

- 31 • Mtb maintains its intrabacterial pH inside both acidic and neutral subcellular  
32 microenvironments of human macrophages
- 33 • Pyrazinamide, but not other frontline antibiotics, acts as a protonophore *in cellulo*
- 34 • Pyrazinamide-mediated intrabacterial pH homeostasis disruption and antibacterial  
35 efficacy requires host endolysosomal acidification
- 36 • Cytosolic localisation mediated by ESX-1 contributes to pyrazinamide antibacterial  
37 activity resistance
- 38 • Pyrazinamide conversion into pyrazinoic acid by the pyrazinamidase/nicotinamidase  
39 PncA is essential for its protonophore activity and efficacy *in cellulo*

## 40 **Summary**

41 The intracellular population of *Mycobacterium tuberculosis* (Mtb) is dynamically segregated  
42 within multiple subcellular niches with different biochemical and biophysical properties that,  
43 upon treatment, may impact antibiotic distribution, accumulation, and efficacy. However, it  
44 remains unclear whether fluctuating intracellular microenvironments alter mycobacterial  
45 homeostasis and contribute to antibiotic enrichment and efficacy. Here, we describe a dual-  
46 imaging approach that allows quantitative monitoring of host subcellular acidification and Mtb  
47 intrabacterial pH profiles by live-fluorescence microscopy in a biosafety level 3 laboratory. By  
48 combining this live imaging approach with pharmacological and genetic perturbations, we  
49 show that Mtb can maintain its intracellular pH independently of the surrounding pH in primary  
50 human macrophages. Importantly, we show that unlike bedaquiline (BDQ), isoniazid (INH) or  
51 rifampicin (RIF), the front-line drug pyrazinamide (PZA) displays antibacterial efficacy by  
52 acting as protonophore which disrupts intrabacterial pH homeostasis *in cellulo*. By using Mtb  
53 mutants with different intra-macrophage localisation, we confirmed that intracellular  
54 acidification is a prerequisite for PZA efficacy *in cellulo*. We anticipate this dual imaging  
55 approach will be useful to identify host cellular environments that affect antibiotic efficacy  
56 against intracellular pathogens.

57

58

## 59 Introduction

60 Tuberculosis (TB), caused by *Mycobacterium tuberculosis* (Mtb), remains one of the  
61 deadliest infectious disease worldwide ([WHO, 2021](#)). In 2020, it was estimated that almost  
62 10 million people developed the active form of the disease and 1.3 million people died from  
63 TB, and recent data indicate that the COVID-19 pandemic is disrupting access to TB care  
64 and treatment ([WHO, 2021](#)).

65 Drug-susceptible TB treatment relies on a standard chemotherapy regimen that includes four  
66 first-line antibiotics, rifampicin (RIF), isoniazid (INH), ethambutol (EMB) and pyrazinamide  
67 (PZA), which are administered over a period of at least six months ([WHO, 2021](#)). This  
68 extensive treatment is often associated with side-effects and toxicity affecting compliance  
69 and contributing to the emergence of antibiotic resistant strains ([Gulbay et al., 2006](#)). In that  
70 context, it is crucial to better understand how current anti-TB chemotherapies work to develop  
71 a new generation of efficient, fast-acting, and compliance-friendly treatments.

72 TB is a complex disease in which Mtb infection is mainly characterized by the formation of  
73 heterogeneous pulmonary granulomatous lesions that evolve dynamically over time ([Cadena  
74 et al., 2017](#); [Lenaerts et al., 2015](#)). Inside these highly structured cellular aggregates,  
75 macrophages constitute the primary niche used by the tubercle bacilli to survive, replicate  
76 and disseminate ([Cohen et al., 2018](#)). To survive and replicate within host macrophages, Mtb  
77 has successfully developed multiple strategies to counteract host cell defence mechanisms  
78 ([Bussi and Gutierrez, 2019](#)). Among them, both modulation and subversion of phagosome  
79 maturation and its ability to survive within acidic and hydrolytic microenvironments have been  
80 demonstrated to be crucial for the intracellular lifestyle of Mtb ([Brodin et al., 2010](#); [Levitte et  
81 al., 2016](#); [MacGurn and Cox, 2007](#); [Pethe et al., 2004](#); [Stewart et al., 2005](#); [Vandal et al.,  
82 2008](#)). In addition, Mtb can damage the phagosome through the action of its type VII secretion  
83 system ESX-1 and cell wall-associated phthiocerol dimycocerosates (PDIM) lipids to access  
84 the pH-neutral, nutrient-rich cytosol ([Augenstreich et al., 2017](#); [Barczak et al., 2017](#); [Bernard  
85 et al., 2020](#); [Lerner et al., 2017](#); [Lerner et al., 2018](#); [Quigley et al., 2017](#); [van der Wel et al.,  
86 2007](#)).

87 Because Mtb is localised in several intracellular niches, the generation of new drug regimens  
88 should consider the efficient targeting of Mtb intracellular populations residing within host  
89 cells. Ideally, anti-TB chemotherapy must include antibiotics with pharmacokinetic properties  
90 that allow agents to (i) penetrate lung tissue and infected cells, (ii) reach the wide-ranging



91 subcellular compartments in which Mtb resides and (iii) be active in these specific  
92 microenvironments to finally display optimal antibacterial efficacy. Understanding how  
93 subcellular environments affect bacterial fitness ([Huang et al., 2019](#); [Rohde et al., 2007](#)) but  
94 more importantly antibiotic localisation, exposure, and consequently efficacy against  
95 intracellular pathogens is crucial and have only recently begun to be investigated ([Liu et al.,](#)  
96 [2016](#); [Santucci et al., 2021](#)).

97 Cell compartment specific consideration of bioactivity is of particular importance for antibiotics  
98 such as the front-line drug PZA, which was demonstrated to be highly potent against the  
99 tubercle bacilli within infected mice but didn't display activity in standard culture conditions *in*  
100 *vitro* ([Malone et al., 1952](#); [Mc and Tompsett, 1954](#); [Solotorovsky et al., 1952](#); [Tarshis and](#)  
101 [Weed, 1953](#)). Indeed, *in vitro* PZA requires an acidic pH below 5.5 to be effective against Mtb  
102 ([Mc and Tompsett, 1954](#); [Zhang et al., 2002](#); [Zhang et al., 1999](#)). In this widely accepted pH-  
103 dependent mechanism of action, PZA enters the bacteria by diffusion and is converted by the  
104 PncA enzyme to form the deprotonated negatively charged POA<sup>(-)</sup> anion (POA<sup>(-)</sup>). This POA<sup>(-)</sup>  
105 anion is then actively exported into the extracellular milieu. If Mtb faces an acidic environment,  
106 POA<sup>(-)</sup> acquires a hydrogen cation to form the neutral protonated HPOA molecule (HPOA).  
107 This protonated form is able to diffuse across the bacterial envelope to finally disrupt  
108 intrabacterial pH homeostasis and membrane potential ([Zhang et al., 2013](#)). Several  
109 independent studies proposed that PZA/POA molecules act as pH-dependent protonophores  
110 *in vitro* to disrupt Mtb intrabacterial pH homeostasis ([Darby et al., 2013](#); [Fontes et al., 2020](#);  
111 [Zhang et al., 1999](#); [Zhang et al., 2003](#)). However, this proposed pH-dependent mode of action  
112 of PZA/POA, where molecules acidify Mtb cytoplasm has been challenged ([den Hertog et al.,](#)  
113 [2016](#); [Peterson et al., 2015](#)). Alternative pH-independent mechanisms underlying PZA/POA  
114 efficacy have been proposed ([Gopal et al., 2019](#); [Lamont et al., 2020](#)) whereby POA<sup>(-)</sup> acting  
115 at neutral pH can competitively inhibit the aspartate decarboxylase PanD and enhance its  
116 targeted degradation *via* the Clp system thus impairing the biosynthesis of Co-enzyme A  
117 ([Gopal et al., 2020](#); [Gopal et al., 2016](#); [Sun et al., 2020](#)). In this model, PZA/POA molecules  
118 are active regardless of the environmental pH surrounding Mtb and do not act as  
119 protonophores. Overall, it is notable that despite being used as a front line drug for almost 70  
120 years in the clinic, the molecular and cellular mechanisms underlying PZA efficacy remain  
121 unclear ([Lamont et al., 2020](#)).

122 By using correlative light electron ion microscopy (CLEIM) approaches we showed that  
123 PZA/POA molecules require phagosomal residency and acidification to efficiently accumulate

124 within Mtb and display optimal activity within human macrophages ([Santucci et al., 2021](#)).  
125 Mtb can transit through neutral and acidic environments multiple times during the infection  
126 cycle ([Bernard et al., 2020](#); [Schnettger et al., 2017](#)), however it remains unclear how these  
127 spatial and temporal changes affect the intracellular activity of PZA and its impacts on  
128 intrabacterial pH homeostasis.

129 To address these questions, we developed a dual-imaging approach that allows monitoring  
130 of endolysosomal acidification and Mtb intrabacterial pH homeostasis in real time. Single cell  
131 quantitative analysis shows that Mtb can maintain its intrabacterial pH independently of the  
132 host pH. By live-cell imaging and tracking of Mtb bacterial populations residing within acidic  
133 endolysosomes, we show that long-term residence within acidic microenvironments, i.e. for  
134 several hours, is not sufficient to impact Mtb pH homeostasis. Using this approach, we  
135 describe the spatiotemporal dynamics of PZA mode of action within Mtb-infected human  
136 macrophages, showing that phagosomal restriction and host subcellular acidification are  
137 crucial for PZA/POA antibacterial efficacy. Finally, by using mycobacterial mutants with  
138 different phenotypes and intracellular lifestyles, we define how both host-driven and bacterial  
139 factors contribute to PZA efficacy in human macrophages.

140

## 141 Results

### 142 A live dual-imaging approach to monitor organelle and Mtb acidification

143 To concomitantly monitor macrophage organelle and Mtb acidification status, we developed  
144 a high-content dual-imaging approach that allows live-fluorescence microscopy visualization  
145 of infected human macrophages, including quantitative measurements of subcellular  
146 acidification and Mtb intrabacterial pH homeostasis. We first generated a Mtb reporter strain  
147 (Mtb pH-GFP) that constitutively produces a ratiometric pH-GFP indicator to dynamically  
148 record intrabacterial pH fluctuations *in vitro* and *in cellulo*, as previously described ([Darby et](#)  
149 [al., 2013](#); [Vandal et al., 2008](#)). This reporter possesses two excitation maxima at wavelengths  
150 405 nm and 488 nm and the ratio of 510 nm fluorescence emissions generated by excitation  
151 at these two excitation wavelengths varies as a function of the protonation state of the GFP  
152 fluorophore. Therefore, a lower 405 nm/488 nm ratio indicates a lower intrabacterial pH  
153 ([Darby et al., 2013](#); [Vandal et al., 2008](#)). Then, human monocyte-derived macrophages  
154 (MDM) and human-induced pluripotent stem cell-derived macrophages (iPSDM) were  
155 infected with the reporter strain for 24 h, a time that allows bacteria to adapt intracellularly  
156 and localise in multiple niches ([Bernard et al., 2020](#); [Lerner et al., 2017](#)). Infected cells were  
157 left untreated or pulsed for an additional 24 h with Concanamycin A (ConA), a selective v-  
158 ATPase inhibitor that inhibits endolysosomal acidification ([Huss et al., 2002](#)), and further  
159 stained with the lysosomotropic fluorescent probe LysoTracker to visualise acidic  
160 endolysosomes and determine host subcellular acidification profile. Next, Mtb-associated  
161 LysoTracker intensity and Mtb intrabacterial pH were analysed by automated high-content  
162 microscopy (**Figure S1**). A quantitative analysis in Mtb-infected MDM (median<sub>CTRL</sub> = 422.6;  
163 IQR<sub>CTRL</sub> = 334.9 and median<sub>ConA</sub> = 241.6; IQR<sub>ConA</sub> = 64.5, respectively) and Mtb-infected  
164 iPSDM (median<sub>CTRL</sub> = 1964.2, IQR<sub>CTRL</sub> = 1006.0 and median<sub>ConA</sub> = 929.3; IQR<sub>ConA</sub> = 1009.4,  
165 respectively) showed that the median Mtb-associated LysoTracker intensity was reduced by  
166 approximately 2-fold upon ConA treatment (**Figure 1A and Figure 1C**), confirming that  
167 endolysosomal acidification was impaired ([Santucci et al., 2021](#)). On the other hand, a  
168 quantitative analysis of Mtb intrabacterial pH in control or ConA-treated conditions were  
169 similar in both infected MDM (**Figure 1B**) and infected iPSDM (**Figure 1D**) with absolute  
170 median differences that were almost null ( $\Delta$ median<sub>pH-GFP</sub> = 0.035 and 0.016 respectively),  
171 suggesting that intracellular acidification does not impact Mtb intrabacterial pH in human  
172 macrophages. To confirm that Mtb can maintain its intrabacterial pH independently of  
173 macrophage pH, we determined the Spearman's correlation coefficient between Mtb pH-GFP

174 ratio values with their corresponding associated LysoTracker intensity. There was no positive  
175 or negative association with correlation coefficients of  $r_s = 0.022$ ,  $p < 0.01$  and  $r_s = 0.062$ ,  
176  $p < 0.0001$  in MDM or iPSDM respectively (**Figure 1E-1H**). Next, we performed live-image  
177 acquisition of Mtb-infected LysoTracker-stained iPSDM at higher-resolution ([Bernard et al.,](#)  
178 [2020](#); [Schnettger et al., 2017](#)). In agreement with the previous findings (**Figure 1G and**  
179 **Figure 1H**), analysis of Spearman's correlation coefficient did not show any correlation  
180 between subcellular acidification profile and Mtb intrabacterial pH with a value of  $r_s = -0.19$ ,  
181  $p < 0.0001$  (**Figure S2**). Altogether these data support the notion that Mtb can maintain its  
182 own pH when facing a wide range of *in vitro* and *in cellulo* environmental pH ([Darby et al.,](#)  
183 [2013](#); [Fontes et al., 2020](#); [Vandal et al., 2008](#)).

#### 184 **Mtb subcellular localisation within acidic compartments and time of residence does** 185 **not affect bacterial pH homeostasis**

186 To complement our live-snapshot imaging approach and capture the dynamic nature of these  
187 transient events, we performed live imaging at low-content/high resolution and tracked  
188 individual mycobacterial regions of interest (mROI) to define whether the time of residency  
189 within LysoTracker positive compartments impacts Mtb intrabacterial pH. Live cell imaging of  
190 Mtb-infected iPSDM was performed over a 6 h period with 30 min intervals to minimise  
191 photobleaching and/or phototoxicity. Monitoring and tracking of mROI revealed at least 4  
192 different phenotypic profiles: (i) LysoTracker<sup>(-)</sup> Mtb that became LysoTracker<sup>(+)</sup> (**Figure 2A**),  
193 (ii) LysoTracker<sup>(+)</sup> Mtb that remained LysoTracker<sup>(+)</sup> (**Figure 2B**), (iii) LysoTracker<sup>(+)</sup> Mtb that  
194 became LysoTracker<sup>(-)</sup> (**Figure 2C**), and (iv) LysoTracker<sup>(-)</sup> Mtb that remained LysoTracker<sup>(-)</sup>  
195 (**Figure 2D**). Next, we analysed the dynamics of Mtb-associated LysoTracker intensity and  
196 pH-GFP ratio (**Figure 2E**) as previously described ([Bernard et al., 2020](#); [Schnettger et al.,](#)  
197 [2017](#)). We observed that over time the association with LysoTracker was very heterogenous  
198 and that Mtb pH-GFP ratio did not significantly change, with no correlation between  
199 LysoTracker association and Mtb pH-GFP ratio (**Figure 2E**). To exclude that prolonged  
200 exposure to low pH within an acidified compartment impacts Mtb pH homeostasis, we  
201 analysed the cumulative values of Mtb-associated LysoTracker fluorescence intensity over  
202 time to include total LysoTracker intensity association during 360 min and the corresponding  
203 Mtb pH-GFP ratios (**Figure 2F**). Thus, giving a quantitative profile of LysoTracker intensity  
204 faced by multiple mROI over the entire time-course. In agreement with the previous analysis,  
205 despite heterogenous accumulation of LysoTracker with Mtb, there was no significant  
206 changes in Mtb pH homeostasis (**Figure 2F**). Determination of Spearman's correlation

207 coefficients at the end time point, did not show positive or negative association between  
208 subcellular acidification profile and Mtb intrabacterial pH with a value of  $r_s = -0.075$  and  $r_s =$   
209  $-0.011$  for the two different analyses respectively (**Figure 2E and 2F**). We concluded that  
210 Mtb is able to maintain its intracellular pH even when facing fluctuating acidic intracellular  
211 environments ([Darby et al., 2013](#); [Fontes et al., 2020](#); [Vandal et al., 2008](#)).

### 212 **Spatiotemporal analysis of PZA-mediated Mtb intrabacterial pH homeostasis** 213 **disruption *in cellulo***

214 Experimental investigations of the molecular mechanism(s) of PZA action have been mostly  
215 performed within *in vitro* cell-free media and it is unknown whether PZA/POA molecules act  
216 as bacterial protonophores to disrupt Mtb intrabacterial pH homeostasis *in cellulo*. To address  
217 this question, human macrophages were infected with Mtb pH-GFP for 24 h and  
218 subsequently treated with PZA, BDQ, INH, RIF or left untreated for an additional 24 h before  
219 being stained with LysoTracker and live-imaged. Quantitative analysis of Mtb-associated  
220 LysoTracker intensity revealed that BDQ treatment was the only condition impacting Mtb-  
221 associated LysoTracker intensity profile as previously reported (median<sub>BDQ</sub> = 4252.1;  
222 IQR<sub>BDQ</sub> = 3369.3 and median<sub>CTRL</sub> = 2502.2; IQR<sub>CTRL</sub> = 1221.3, respectively) (**Figure 3A**)  
223 ([Giraud-Gatineau et al., 2020](#)). However, despite its proposed ionophore activity *in vitro*  
224 ([Hards et al., 2018](#)) and potent activity of enhancing the intracellular acidification processes  
225 ([Giraud-Gatineau et al., 2020](#)), such effects were not sufficient to overcome bacterial  
226 regulation of cytosolic pH, as we did not observe changes in Mtb intrabacterial pH in the  
227 presence of BDQ (mean normalised pH-GFP ratio of -0.006;  $p$ -value = 0.887) (**Figure 3B-C**).  
228 Similar results were obtained in the presence of INH and RIF where Mtb pH-GFP ratios were  
229 similar to the untreated control condition (mean normalised pH-GFP ratios of 0.016;  $p$ -  
230 value = 0.160 and -0.014;  $p$ -value = 0.319, respectively) (**Figure 3B-C**). Strikingly, from the  
231 four different antibiotics tested, PZA was the only one able to induce changes in Mtb pH-GFP  
232 ratio, providing evidence that PZA displays intrabacterial pH-disruptive activity in Mtb-infected  
233 human macrophages (mean normalised pH-GFP ratio of 0.155;  $p$ -value  $\leq 0.001$ ) (**Figure 3C**).  
234 PZA/POA molecules require endolysosomal acidification to accumulate inside Mtb and  
235 display antimicrobial efficacy ([Santucci et al., 2021](#)). We hypothesized that this process is  
236 likely resulting from the conversion of POA<sup>(-)</sup> into its protonated form HPOA within acidic host-  
237 microenvironments (**Figure 3D**). To investigate whether PZA/POA-mediated intrabacterial  
238 pH homeostasis disruption *in cellulo* requires endolysosomal acidification, Mtb-infected MDM  
239 were treated with increasing concentration of PZA ranging from 0 to 400 mg/L in the presence

240 or absence of the v-ATPase inhibitor ConA and both host and bacterial acidification profiles  
241 were monitored at 4 h, 16 h, 24 h and 72 hours post-treatment (**Figure 3E**) using our live  
242 dual-imaging approach. Quantitative analysis of Mtb pH-GFP fluorescence profiles at the  
243 indicated time points in untreated control cells confirmed that Mtb can stably maintain  
244 intrabacterial pH through the course of the infection (**Figure 3F-I**). Treatment of infected  
245 human macrophages with PZA was able to decrease Mtb intrabacterial pH in a time- and  
246 concentration-dependent manner (**Figure 3F-I**). After 4 h of treatment, only 400 mg/L of PZA  
247 showed a detectable effect on Mtb intrabacterial pH (mean normalised pH-GFP ratio of  
248 0.0625;  $p$ -value  $\leq 0.01$ ) (**Figure 3F**). After 16 h, 24 h and 72 h, PZA concentrations ranging  
249 from 30 mg/L to 400 mg/L significantly disrupted bacterial pH homeostasis (**Figure 3G-3I**).  
250 The absolute changes in Mtb pH-GFP ratio relative to the control condition, confirmed a time-  
251 and concentration-dependent effect of PZA on Mtb intrabacterial pH (**Figure 3J-M**).  
252 Importantly, PZA treatment did not induce rerouting of Mtb into endolysosomal compartments  
253 (**Figure S3**), ruling out a concentration-dependent effect towards pH-GFP ratio due to  
254 excessive lysosomal delivery. We also noticed that the LysoTracker intensity profile  
255 decreased overtime independently of the infection, suggesting that human primary  
256 macrophages display optimal lysosomal activity for a limited amount of time during their *in*  
257 *vitro* lifespan (**Figure S4**). ConA co-treatment with increasing concentrations of PZA resulted  
258 in an almost complete loss of PZA Mtb pH-disruptive function (**Figure 3J-M**) suggesting that  
259 functional acidification of the Mtb phagosome is a prerequisite for PZA-mediated pH  
260 disruption in intracellular Mtb. Quantitative correlative analysis of Mtb pH-GFP ratio values  
261 with associated LysoTracker intensity at increasing PZA concentrations did not show a direct  
262 association, with Spearman's correlation coefficients  $r_s$  between - 0.3 and 0.3 (**Figure S5**).  
263 These data highlight that PZA-mediated pH homeostasis disruption within acidic  
264 environments is a dynamic process.

### 265 **Endolysosomal acidification and protonophore activity of PZA contribute to Mtb** 266 **restriction in human macrophages**

267 We next hypothesized that functional host intracellular acidification and PZA-mediated pH-  
268 decrease are required for mycobacterial growth inhibition. In order to test this hypothesis, we  
269 quantified Mtb intracellular replication at the single-cell level in the presence of increasing  
270 concentration of PZA in both control or ConA treated cells (**Figure 4A**). Results from dose-  
271 response analysis showed that functional endolysosomal acidification, required for PZA-  
272 mediated pH disruption, is also required for optimal PZA efficacy and Mtb growth restriction



273 over the course of infection (**Figure 4A**). The determination of PZA half maximal effective  
274 concentration ( $EC_{50}$ ) using a four-parameter logistic non-linear regression model showed that  
275 ConA co-treatment increased, by approximately 3.5 times, the amount of antibiotic required  
276 to efficiently inhibit 50% of Mtb growth *in cellulo* ( $49.5 \pm 19.2$  mg/L and  $173.1 \pm 35.2$  mg/L,  
277 respectively) (**Figure 4A-4B**). These results agree with our previous observations showing  
278 that the use of v-ATPase inhibitors is able to counteract PZA/POA-mediated growth inhibition  
279 by impairing POA accumulation within the bacteria ([Santucci et al., 2021](#)). These experiments  
280 were also performed in another human macrophage model using iPSDM (**Figure S6**).  
281 Notably, in iPSDM antagonistic effects between PZA and ConA were also observed, however  
282 the phenotypes were less pronounced than in Mtb-infected MDM suggesting that iPSDM and  
283 MDM might have different intracellular pH homeostatic processes. Altogether, these findings  
284 support the proposed pH-dependent mode of action of PZA, in which endolysosomal  
285 acidification is a necessary prerequisite and driver of the protonophore activity of PZA/POA,  
286 which controls bacterial growth in human macrophages.

### 287 **Mtb mutants with different subcellular localisations show distinct PZA susceptibility** 288 **profiles *in cellulo***

289 To define how intracellular localisation contributes to PZA/POA antibacterial efficacy, we  
290 assessed PZA-mediated pH homeostasis disruption and growth inhibition towards multiple  
291 Mtb mutants with distinct intracellular lifestyles (**Figure 5A**). Mtb WT harbouring a functional  
292 ESX-1 secretion system was used as the reference strain and Mtb  $\Delta RD1$  lacking a functional  
293 ESX-1 machinery was used as a phagosome-restricted strain. We also included another  
294 phagosome-restricted mutant, Mtb  $\Delta esxB$  which lacks only the two major ESX-1 effectors  
295 EsxA and EsxB (also known as ESAT-6 and CFP-10). A relative growth index was quantified  
296 for each strain, and a dose-response analysis using a four-parameter logistic non-linear  
297 regression model was performed to determine PZA  $EC_{50}$  towards each strain (**Figure 5B-**  
298 **5D**). Results obtained after curve fitting showed that  $EC_{50}$  towards the reference strain Mtb  
299 WT was  $33.8 \pm 8.5$  mg/L. Both Mtb  $\Delta RD1$  and Mtb  $\Delta esxBA$  displayed increased susceptibility  
300 to PZA with  $EC_{50}$  values of  $13.0 \pm 3.7$  and  $17.8 \pm 7.2$  mg/L respectively. Determination of  
301  $EC_{50}$  values further highlighted the increased in susceptibility of strains unable to damage the  
302 endolysosomal membrane and access host cytosol with a 2.60- and 1.90-fold increase for  
303 Mtb  $\Delta RD1$  and Mtb  $\Delta esxBA$  respectively, when compared to the WT reference strain  
304 (**Figure 5C**). Thus, a functional ESX-1 secretion system is protective against PZA/POA  
305 activity in Mtb infected macrophages, potentially through facilitating membrane damage and

306 cytosolic access. Previous work showed that disruption of Mtb intrabacterial pH homeostasis  
307 caused by pharmacological inhibitors directly correlated with a mycobactericidal effect ([Darby  
308 et al., 2013](#)). We investigated whether a PZA-mediated pH decrease was correlated with  
309 intracellular growth defects. Relative growth index values were plotted as a function of  
310 normalised pH-GFP ratios at each PZA concentration and Spearman's correlation  
311 coefficients were determined for each strain (**Figure 5E**). Notably, PZA-mediated pH  
312 homeostasis disruption strongly correlated with the intracellular replication defect ( $r_s$  values  
313 ranging from -0.82 to -0.86) suggesting that PZA-mediated intrabacterial pH disruption is an  
314 important factor in its antibacterial activity (**Figure 5E**).

### 315 **PZA-mediated intrabacterial pH disruption and growth inhibition *in cellulo* requires** 316 **POA conversion by functional PncA**

317 Finally, we sought to understand whether PZA conversion to POA was essential to display  
318 its pH-disruptive property and antibacterial capacity. To answer this question, we used the  
319 bovine TB agent and zoonotic pathogen, *Mycobacterium bovis* (Mbv). As a member of the  
320 *Mycobacterium tuberculosis* complex, Mbv was chosen due to its ability to replicate within  
321 human macrophages ([Queval et al., 2021](#)) and its well-characterised intrinsic resistance  
322 towards PZA ([Petrella et al., 2011](#); [Scorpio and Zhang, 1996](#)). Indeed, Mbv harbours a point  
323 mutation within its *pncA* gene that is responsible for the H57D substitution, which blocks PZA  
324 to POA conversion ([Petrella et al., 2011](#); [Scorpio and Zhang, 1996](#)). We generated a pH-GFP  
325 reporter Mbv strain (Mbv pH-GFP) and assessed whether PZA-mediated pH disruption was  
326 occurring in Mbv-infected MDM. As expected, without PZA to POA conversion, no  
327 protonophore activity was noticeable against Mbv (**Figure 6A and 6D**) even at 400mg/L. In  
328 addition, PZA intracellular activity on Mbv replication was also investigated by quantitative  
329 fluorescence microscopy. In agreement with previous reports from *in vitro* studies ([Scorpio  
330 and Zhang, 1996](#)), Mbv was resistant to PZA *in cellulo* (**Figure 6B, 6C and 6E**). These results  
331 demonstrate that *in cellulo*, the protonophore activity of PZA is mediated by its active form  
332 POA and that such conversion is essential for antibacterial activity within infected  
333 macrophages.

334



## 335 Discussion

336 Here we described a novel live dual imaging approach to monitor pH homeostasis within both  
337 the host cell and the pathogen in a biosafety level 3 laboratory. This approach is applicable  
338 to both human primary monocyte derived macrophages (MDM) and human iPS-derived  
339 macrophages (iPSDM). In both MDM and iPSDM, ConA treatment was able to reduce Mtb-  
340 associated LysoTracker intensity suggesting that this pharmacological inhibition is a powerful  
341 approach to perturb endolysosomal acidification in these two macrophage models.  
342 Quantitative analysis revealed that the regulation of Mtb intrabacterial pH *in cellulo* is not  
343 homogeneous with a subset of bacilli displaying a differential pH regulation as shown in *E. coli*  
344 *in vitro* ([Goode et al., 2021](#)). At the intra-macrophage population level, our data show that  
345 Mtb can maintain its own pH within endolysosomes of human macrophages, in agreement  
346 with previous findings *in vitro* and in mouse macrophages treated or not with interferon- $\gamma$   
347 ([Darby et al., 2013](#); [Fontes et al., 2020](#); [Vandal et al., 2008](#)). An important finding of our  
348 analysis is that impairment of endolysosomal acidification had no impact on intracellular Mtb  
349 pH homeostasis. Despite a very significant heterogeneity in LysoTracker association, most  
350 bacteria maintained their intracellular pH during the course of infection, suggesting that Mtb  
351 is very efficient at regulating intrabacterial pH in its preferred host cell.

352 Intracellular Mtb continuously switches between membrane bound (able to retain protons and  
353 acidic) and cytosolic (host-cell neutral pH) localisation ([Bussi and Gutierrez, 2019](#)) and here  
354 by using live imaging of subcellular acidification, we tested the hypothesis that when residing  
355 in an acidic environment, the exposure to an acidic pH will reduce intrabacterial pH.  
356 Unexpectedly, we found that irrespective of the time of residence in an acidic compartment,  
357 the bacilli maintained a constant intrabacterial pH, suggesting that mycobacteria have potent  
358 mechanisms of pH sensing and homeostasis in fluctuating environments and can rapidly  
359 respond to changes ([Krulwich et al., 2011](#); [Vandal et al., 2009](#)). A limitation of our study is  
360 that we are not able to define if these bacteria in an acidic host compartment are alive and  
361 able to replicate, in a non-replicating state or eventually dead. More studies and technical  
362 developments are required to explore this in detail. It is also important to mention that  
363 LysoTracker staining doesn't allow to clearly discriminate between pH 4.5 and 5.5, therefore  
364 we cannot exclude that differences might occur at these distinct pH values if residing for  
365 extensive period of time. However, previous studies in other biological models, showed that  
366 pH 5.5 or even 4.5 were not altering Mtb pH homeostasis and survival suggesting the Mtb  
367 can adapt and survive within these conditions ([Darby et al., 2013](#); [Fontes et al., 2020](#); [Vandal](#)

368 [et al., 2008](#)). We also anticipate our system can be applied to other intracellular bacteria that  
369 temporarily inhabit acidic compartments such as *Salmonella* spp., *Shigella* spp. or *Coxiella*  
370 *burnetti*.

371 Our dual imaging allowed us to define if, in macrophages, the localisation in acidic  
372 compartments affected the intrabacterial pH after treatment with antibiotics used in the clinic  
373 to treat tuberculosis. Remarkably, out of four antibiotics, each with different modes of action,  
374 we found that in human macrophages, only PZA disrupts Mtb intrabacterial pH homeostasis  
375 in a concentration and time dependent manner. For BDQ, which is effective against Mtb within  
376 infected human macrophages ([Giraud-Gatineau et al., 2020](#); [Greenwood et al., 2019](#)), we  
377 could confirm that treatment targets bacteria to acidic compartments ([Giraud-Gatineau et al.,](#)  
378 [2020](#)), however without resulting in significant changes in intrabacterial pH, as was previously  
379 suggested as the BDQ mode of action ([Hards et al., 2018](#)). This also suggests that  
380 intrabacterial pH imaging is not a reliable proxy of bacterial viability (at least in this system).  
381 Our findings seem to be different from what has been previously observed with *M. smegmatis*  
382 where it was proposed that global antibiotic-induced pH alterations should be considered a  
383 potential mechanism contributing to antibiotic efficacy ([Bartek et al., 2016](#)).

384 The study of the PZA molecular mechanism(s) of action, and its extensive association with  
385 acidic pH for efficacy, have been mostly performed *in vitro* ([Mc and Tompsett, 1954](#); [Zhang](#)  
386 [et al., 2002](#); [Zhang et al., 1999](#); [Zhang et al., 2013](#)). Here, we provide compelling evidence  
387 that PZA acts as a bacterial protonophore that disrupts Mtb intrabacterial pH homeostasis *in*  
388 *cellulo*. These changes in intrabacterial pH homeostasis can be prevented by inhibiting the  
389 macrophage v-ATPase activity with ConA, likely impairing the conversion of POA<sup>(-)</sup> into HPOA  
390 inside endolysosomes. The significant effect of ConA in preventing the pH-disruption  
391 correlates with an increase in bacterial growth showing that there is a link between pH-  
392 disruption and efficacy of protonophores as previously shown ([Darby et al., 2013](#)). This link  
393 between intrabacterial pH alteration and efficacy seems to apply only to PZA, since the other  
394 three very potent antibiotics we tested BDQ, RIF and INH are also effective against  
395 intracellular Mtb without affecting the intrabacterial pH.

396 Finally, by combining our dual imaging approach with mycobacterial mutants and naturally  
397 PZA-resistant strains, we were able to define if intracellular localisation affects the pH-  
398 disruption related efficacy of PZA. Notably two different mutants with a deficient ESX-1  
399 secretion system showed a substantial reduction in growth when compared to the wild type

400 strain after PZA treatment, a finding that reflects the increase in PZA accumulation reported  
401 previously ([Santucci et al., 2021](#)). Indeed, NanoSIMS analysis of PZA/POA accumulation  
402 showed that two-times more  $\Delta$ RD1 bacteria were positive for this antibiotic in comparison to  
403 the WT strain ([Santucci et al., 2021](#)), which supports the two-fold difference in PZA EC<sub>50</sub> we  
404 observed in this study. Similarly, ConA treatment negatively impacted by 3-4 times the  
405 amount of WT bacteria displaying a positive signal for the antibiotic by NanoSIMS ([Santucci  
406 et al., 2021](#)), which was reflected by the 3.5-fold difference in antibacterial efficacy when  
407 analysing the EC<sub>50</sub> of PZA alone or in combination with ConA in the present study. Such  
408 results suggest a strong correlation between antibiotic accumulation and antibacterial efficacy  
409 as previously reported using bulk LC-MS/MS analysis ([Richter et al., 2017](#)). The use of  
410 mutants with different lifestyles in our experimental system has highlighted that cytosolic  
411 localisation can be an important factor that dictates antibiotic susceptibility *in cellulo*. Our data  
412 with ESX-1 defective mutants suggest that continuous and homogenous residence in a  
413 phagosome affects sensitivity to PZA and subsequently intrabacterial pH homeostasis  
414 disruption.

415 Within macrophages, Mbv was not sensitive to PZA which did not affect intrabacterial pH  
416 suggesting that POA, but not PZA, is primarily responsible for the pH-disruption effect. This  
417 confirms that POA is the main active form of the drug and that its inhibitory effect is tightly  
418 linked to pH *in cellulo*. Importantly, our results show that PZA accumulation and efficacy  
419 require acidic environments within host cells, highlighting that the pH-dependent mechanism  
420 of action is crucial in more sophisticated biological systems ([Lamont et al., 2020](#)). It is worth  
421 mentioning that the results obtained in this study are different from the one described *in vitro*  
422 by Peterson *et al.* ([Peterson et al., 2015](#)) showing that PZA/POA did not induce pH  
423 homeostasis disruption even at pH 5.8. These discrepancies could be explained by some  
424 differing experimental parameters including differences between *in cellulo* and *in vitro*  
425 investigations, the use of H37Ra and H37Rv strains, and the increased sensitivity of  
426 fluorescence microscopy in contrast to bulk spectrofluorimetric analysis. Finally, more  
427 investigations will be required to determine whether PanD inhibition could be potentially  
428 targeted by the drug under these conditions, and directly or indirectly involved in this pH-  
429 dependent antibacterial inhibition.

430 Because wild type Mtb displays a heterogenous subcellular localisation, where a fraction of  
431 Mtb is localised in phagosomes but another fraction is in the cytosol, we postulate that  
432 dynamic and heterogenous environments contribute to the pH-disruptive action of PZA in

433 human macrophages. We believe that such methodology, our findings, and the concepts that  
434 have emerged from this study will be valuable to characterise antibiotic modes of action *in*  
435 *cellulo*.

#### 436 **Significance**

437 We still do not completely understand why tuberculosis treatment requires the combination  
438 of several antibiotics for up to six months. Mtb is an intracellular pathogen and it is still  
439 unknown whether heterogenous and dynamic intracellular populations of bacteria in different  
440 cellular environments affect antibiotic efficacy. By developing a dual live imaging approach to  
441 monitor mycobacterial pH homeostasis, host-cell environment and antibiotic action, we show  
442 here that intracellular localisation of Mtb affects the efficacy of one first-line anti-TB drug. Our  
443 observations can be applicable to the treatment of other intracellular pathogens and help to  
444 inform the development of more effective combined therapies for tuberculosis that target  
445 heterogenous bacterial populations within the host.

446 **Supplemental Information**

447 Supplemental Information is attached to this manuscript and contains 6 additional figures with  
448 their corresponding legends.

449 **Acknowledgements**

450 We would like to acknowledge all members of the Host-Pathogen Interactions in Tuberculosis  
451 laboratory for insightful discussions. We thank D. Branch Moody for critical reading of the  
452 manuscript and helpful discussions. This work was supported by the Francis Crick Institute  
453 (to MGG), which receives its core funding from Cancer Research UK (FC001092), the UK  
454 Medical Research Council (FC001092), and the Wellcome Trust (FC001092). This project  
455 has also received funding from the European Research Council (ERC) under the European  
456 Union's Horizon 2020 research and innovation programme (grant agreement n°772022). For  
457 the purpose of Open Access, the authors have applied a CC BY public copyright licence to  
458 any Author Accepted Manuscript version arising from this submission. CB has received  
459 funding from the European Respiratory Society and the European Union's H2020 research  
460 and innovation programme under the Marie Skłodowska-Curie grant agreement n°713406.  
461 PS is supported with a non-stipendiary FEBS long-term fellowship and has received funding  
462 from the European Union's H2020 research and innovation programme under the Marie  
463 Skłodowska-Curie grant agreement *SpaTime\_AnTB* n°892859.

464 **Authors contribution**

465 PS and MGG conceived the study and designed the experiments. PS performed most of the  
466 experiments with help from BA, LB, EB, CB, EP and NA. All authors provided intellectual  
467 input by analysing and/or discussing data. PS and MGG wrote the manuscript. All authors  
468 read the manuscript and provided critical feedback before submission.

469 **Declaration of interests**

470 The authors declare no competing interests.

471

472 **Figures Legends**

473 **Figure 1: High content dual-imaging of Mtb intrabacterial pH and host-cell intracellular**  
474 **acidification**

475 Human macrophages were infected for 24 hours and subsequently treated with ConA or left  
476 untreated for an additional 24 hours. Cells were then pulsed with 200 nM of LysoTracker Red  
477 for 30 min before live-acquisition was performed using the OPERA Phenix imaging platform.  
478 Quantitative analysis of Mtb pH-GFP ratio (405/488nm) and Mtb-associated LysoTracker  
479 were performed using the Harmony software. **(A-C)** Quantification of Mtb-associated  
480 LysoTracker mean fluorescence intensities within **(A)** infected-MDM or **(C)** infected-iPSDM  
481 in the absence (pink) or presence (cyan) of v-ATPase inhibitor ConA. Results obtained from  
482 CTRL or ConA-treated samples are displayed as raincloud plots where black box-plots are  
483 overlaid on top of individual raw data and associated with their respective density plots. **(B-**  
484 **D)** Quantification of Mtb pH-GFP ratio (405/488nm) within **(B)** infected-MDM or **(D)** infected-  
485 iPSDM in the absence (pink) or presence (cyan) of v-ATPase inhibitor ConA. Results  
486 obtained from CTRL or ConA-treated samples are displayed as raincloud plots where black  
487 box-plots are overlaid on top of individual raw data and associated with their respective  
488 density plots. **(E-F)** Representative micrographs display LysoTracker labelling (red) and Mtb  
489 pH-GFP (green). Ratiometric signal was obtained by dividing the fluorescence intensity  
490 acquired with excitation/emission channels of 405/510 nm by the one obtained at  
491 488/510 nm. Ratiometric signal is displayed as a 16-colour palette ranging from 0 to 1.6 units.  
492 Scale bar corresponds to 50  $\mu\text{m}$ . Panel **(E)** shows MDM and panel **(F)** iPSDM. Regions of  
493 interest highlighted by the white rectangles, are shown in detail in the bottom panels  
494 respectively. Scale bar corresponds to 10  $\mu\text{m}$ . **(G-H)** Spearman's correlation between Mtb-  
495 associated LysoTracker (x-axis) and Mtb pH-GFP ratio (405/488nm) (y-axis) signals in  
496 individual bacterial region of interests within **(G)** infected-MDM or **(H)** infected-iPSDM. The  
497 cyan line shows the linear regression model, the Spearman rank correlation coefficient ( $r_s$ )  
498 and the corresponding  $p$ -value were calculated by using the ggpubr R package and two-tailed  
499 statistical t-test. Between 5895 and 15823 bacterial regions of interest were analysed per  
500 experimental condition. Results are representative are from  $n = 2$  biologically independent  
501 experiments performed at least in two-three technical replicates.

502

503



504 **Figure 2: Live-cell imaging of Mtb pH homeostasis in acidic subcellular compartments**

505 Human iPSDM were infected for 24 hours and then pulsed with 200 nM of LysoTracker Red  
506 for 30 min before live-acquisition was performed using a Leica SP5 AOBS Laser Scanning  
507 Confocal Microscope. Quantitative analysis of Mtb pH-GFP ratio (405/488nm) and Mtb-  
508 associated LysoTracker were performed using the open source Fiji software. **(A-D)**  
509 Representative micrographs display LysoTracker labelling (red) and Mtb pH-GFP (green) of  
510 4 distinct mROI (3, 10, 14 and 15 respectively) with different LysoTracker associated  
511 fluorescence patterns along the kinetic. Ratiometric signal was obtained by dividing the  
512 fluorescence intensity acquired with excitation/emission channels of 405/510 nm by the one  
513 obtained at 488/510 nm. Ratiometric signal is displayed as a 16-colour palette ranging from  
514 0 to 1.6 units. Events of interest are highlighted with white squares and a zoom in is displayed  
515 at the top right corner of each micrograph. Scale bar corresponds to 10  $\mu$ m. **(E)** Quantitative  
516 analysis of intracellular Mtb-associated LysoTracker intensity and Mtb pH-GFP profiles of  
517 single-tracked mROI over time. Left panel shows the mean LysoTracker intensity associated  
518 to Mtb pH-GFP and the right panel shows their corresponding fluorescence ratio profiles.  
519 Bottom panel shows Spearman's correlation between Mtb-associated LysoTracker (x-axis)  
520 and Mtb pH-GFP ratio (405/488nm) (y-axis) signals from single-tracked mROI at the end of  
521 the kinetic ( $t_{360 \text{ min}}$ ). Spearman rank correlation coefficient ( $r_s$ ) was calculated by using the  
522 ggpubr R package. Each colour represents one mROI and the corresponding legend is  
523 displayed in **(F)**. **(F)** Quantitative analysis of cumulative Mtb-associated LysoTracker intensity  
524 and Mtb pH-GFP profiles of single-tracked mROI over time. Left panel shows the cumulative  
525 mean LysoTracker intensity associated to Mtb pH-GFP and the right panel shows their  
526 corresponding fluorescence ratio profiles. Bottom panel shows Spearman's correlation  
527 between cumulative Mtb-associated LysoTracker values (x-axis) and cumulative Mtb pH-  
528 GFP ratio values (405/488nm) (y-axis) signals from single-tracked mROI over the kinetic  
529 ( $t_{360 \text{ min}}$ ). Spearman rank correlation coefficient ( $r_s$ ) was calculated by using the ggpubr R  
530 package. Each colour represents one mROI and the corresponding legend is displayed on  
531 the right of the panel. Results are from n = 15 individually tracked mROI.

532

533 **Figure 3: Spatiotemporal analysis of PZA-mediated Mtb intrabacterial pH homeostasis**  
534 **disruption *in cellulo***

535 **(A-C)** Human macrophages were infected with Mtb pH-GFP for 24 hours and subsequently  
536 treated with either 100 mg/L of PZA, 2.5 mg/L of BDQ, 5 mg/L of INH, 5 mg/L of RIF or left  
537 untreated for 24 hours. Cells were then pulsed with 200 nM of LysoTracker Red for 30 min  
538 before live-acquisition was performed using the OPERA Phenix imaging platform. **(A)**  
539 Quantification of Mtb-associated LysoTracker mean intensity or **(B)** Mtb pH-GFP ratio  
540 (405/488nm) within infected-MDM treated with different antibiotics for 24 hours. Results are  
541 displayed as raincloud plots where black box-plots are overlaid on top of individual raw data  
542 and associated with their respective density plots. Between 1102 and 1658 bacterial regions  
543 of interest were analysed per experimental condition. **(C)** Determination of absolute changes  
544 in Mtb pH-GFP ratio (405/488nm) upon various antibiotic treatment. Mean pH-GFP ratio of  
545 each antibiotic treatment was subtracted from the untreated control 24-hours post-treatment  
546 to obtain an absolute value reflecting antibiotic-mediated pH disruption normalized to the  
547 control. Determination of normalized pH-GFP ratio was performed for each condition and  
548 results are displayed as box-plots with individual replicate data. Black dots were added to  
549 highlight the mean of each conditions. Each colour represents a specific antibiotic or the  
550 control condition. Results are from  $n = 2$  biologically independent experiments performed at  
551 least in two-three technical replicates. Statistical analysis was performed using Wilcoxon  
552 signed-rank test where untreated control was used as reference condition (where \*  $p \leq 0.05$ ;  
553 \*\*  $p \leq 0.01$ ; \*\*\*  $p \leq 0.001$ ). **(D)** Chemical structures of PZA, POA<sup>(-)</sup> and HPOA. Conversion of  
554 the prodrug PZA into POA<sup>(-)</sup> is mediated by the bacterial pyrazinamidase PncA and transition  
555 of POA<sup>(-)</sup> into HPOA is driven by proton availability. **(E)** Schematic representation of the  
556 experimental procedure followed to perform MDM infection, staining and fluorescence  
557 microscopy imaging. **(F-M)** Human macrophages were infected for 24 hours and  
558 subsequently treated with increasing concentration of PZA ranging from 0-400 mg/L in  
559 absence or presence of ConA for 4 h, 16 h, 24 h or 72 hours. Cells were then pulsed with  
560 200 nM of LysoTracker Red for 30 min before live-acquisition was performed using the  
561 OPERA Phenix imaging platform. **(F-I)** Quantification of Mtb pH-GFP ratio (405/488nm) within  
562 infected-MDM treated with increasing concentration of PZA ranging from 0-400 mg/L in the  
563 absence or presence of v-ATPase inhibitor ConA at 4 h, 16 h, 24 h or 72 hours post-  
564 treatment. Results are displayed as raincloud plots where black box-plots are overlaid on top  
565 of individual raw data and associated with their respective density plots. Each colour



566 represents a specific PZA concentration. Between 2164 and 8813 bacterial regions of interest  
567 were analysed per experimental condition **(J-M)** Determination of absolute changes in Mtb  
568 pH-GFP ratio (405/488nm) upon PZA treatment. Mean pH-GFP ratio of each antibiotic  
569 treatment was subtracted from the PZA-untreated control to obtain an absolute value  
570 reflecting antibiotic-mediated pH disruption normalized to its respective control in the  
571 presence or absence of ConA at 4 h, 16 h, 24 h or 72 hours post-treatment. Determination of  
572 normalized pH-GFP ratio was performed in the absence (pink) or presence (cyan) of v-  
573 ATPase inhibitor ConA. Results are displayed as box-plots with individual data. Black dots  
574 were added to highlight the mean of each conditions. Results are from n = 2 biologically  
575 independent experiments performed at least in two-three technical replicates. Statistical  
576 analysis was performed using Wilcoxon signed-rank test where PZA effect on Mtb  
577 intrabacterial pH was assessed against the untreated control (where \*  $p \leq 0.05$ ; \*\*  $p \leq 0.01$ ;  
578 \*\*\*  $p \leq 0.001$ ) and ConA effect towards PZA was assessed by comparing each concentration  
579 with its respective untreated control as reference condition (where #  $p \leq 0.05$ ; ##  $p \leq 0.01$ ;  
580 ###  $p \leq 0.001$ ).

581

582 **Figure 4: PZA-mediated growth inhibition requires endolysosomal acidification within**  
583 **human macrophages**

584 Human macrophages were infected with Mtb WT E2-Crimson for 24 hours and subsequently  
585 treated with increasing concentration of PZA ranging from 0-400 mg/L in the absence or  
586 presence of ConA for 72 hours. **(A)** Quantitative analysis of E2-Crimson Mtb WT replication  
587 at the single cell level within MDM treated with increasing concentration of PZA in the  
588 absence or presence of ConA. Normalization was done to the mean Mtb area per cell pre-  
589 treatment ( $t_{24h}$  post-infection) and the control condition without PZA was used as reference  
590 corresponding to 100 % growth. Determination of relative growth index was performed in the  
591 absence (pink) or presence (cyan) of v-ATPase inhibitor ConA. Results are displayed as box-  
592 plots with individual replicate data. Black dots were added to highlight the mean of each  
593 condition. Between 1185 and 1925 Mtb-infected MDM were analysed by high-content single-  
594 cell microscopy and results are representative from  $n = 2$  biologically independent  
595 experiments performed at least in two-three technical replicates. Statistical analysis was  
596 performed using Wilcoxon signed-rank test where untreated control was used as reference  
597 condition (where \*  $p \leq 0.05$ ; \*\*  $p \leq 0.01$ ; \*\*\*  $p \leq 0.001$ ) **(B)** Determination of PZA  $EC_{50}$  in the  
598 absence or presence of ConA by performing a 4-parameter nonlinear logistic regression of  
599 the data displayed in **(A)**. **(C)** Representative confocal fluorescence images of Mtb WT-  
600 infected MDM for 24 hours and further treated for 72 hours with increasing concentrations of  
601 PZA. Magnifications display nuclear staining (blue) and Mtb-producing E2-Crimson (red).  
602 Scale bar corresponds to 50  $\mu m$ . Micrographs are representative of 2 independent  
603 experiments.

604

605 **Figure 5: RD1- and EsxBA-mediated endolysosomal damage partially protects Mtb**  
606 **against PZA activity *in cellulo***

607 Human macrophages were infected with Mtb WT, Mtb  $\Delta$ RD1 or Mtb  $\Delta$ esxBA for 24 hours and  
608 subsequently treated with increasing concentrations of PZA ranging from 0-400 mg/L for  
609 72 hours. **(A)** A schematic representation of Mtb WT, Mtb  $\Delta$ RD1 and Mtb  $\Delta$ esxBA intracellular  
610 lifestyles. The contribution of RD1 and EsxBA virulence factors in membrane damage and  
611 cytosolic access is highlighted in the right panel. **(B)** Quantitative analysis of fluorescent Mtb  
612 strain replication at the single cell level within MDM treated with increasing concentrations of  
613 PZA. Normalization was done to the mean Mtb area per cell pre-treatment ( $t_{24h}$  post-infection)  
614 and the control condition without PZA was used as reference corresponding to 100 % growth.  
615 Results are displayed as box-plots with individuals replicate data. Black dots were added to  
616 highlight the mean of each conditions. Between 3880 and 10874 Mtb-infected MDM were  
617 analysed by high-content single-cell microscopy and results are representative from  $n = 4$   
618 biologically independent experiments performed at least in two-three technical replicates. **(C)**  
619 Determination of PZA  $EC_{50}$  for the different Mtb strains by performing a 4-parameter nonlinear  
620 logistic regression of the data displayed in **(B)**. **(D)** Representative confocal fluorescence  
621 images of Mtb WT, Mtb  $\Delta$ RD1 or Mtb  $\Delta$ esxBA-infected MDM for 24 hours and further treated  
622 for 72 hours with increasing concentrations of PZA. Magnifications display nuclear staining  
623 (blue) and fluorescent Mtb (green). Scale bar corresponds to 50  $\mu$ m. Micrographs are  
624 representative of 4 independent experiments. **(E)** Spearman's correlation between  
625 normalized Mtb pH-GFP ratio (405/488nm) at 24 hours post-treatment (x-axis) and Mtb  
626 relative growth index (y-axis) within infected-MDM at 72 hours post-treatment. Results from  
627 Mtb WT, Mtb  $\Delta$ RD1 and Mtb  $\Delta$ esxBA are shown from top panel to the bottom panel  
628 respectively. The black line shows the linear regression model, the Spearman rank correlation  
629 coefficient ( $r_s$ ) and the corresponding  $p$ -value were calculated by using the ggpubr R package  
630 and two-tailed statistical t-test. Results are from  $n = 2$  or  $n = 4$  biologically independent  
631 experiments performed at least in two-three technical replicates.

632

633

634 **Figure 6: PZA-mediated intrabacterial pH homeostasis disruption and growth**  
635 **inhibition *in cellulo* requires functional PncA**

636 Human macrophages were infected with Mbv pH-GFP, for 24 hours and subsequently treated  
637 with increasing concentrations of PZA ranging from 0-400 mg/L for 24 hours. Cells were then  
638 pulsed with 200 nM of LysoTracker Red for 30 min before live-acquisition was performed  
639 using the OPERA Phenix imaging platform. **(A)** Quantification of Mbv pH-GFP ratio  
640 (405/488nm) within infected-MDM treated with increasing concentration of PZA ranging from  
641 0-400 mg/L at 24 hours post-treatment. Results are displayed as raincloud plots where black  
642 box-plots are overlaid on top of individual replicate data and associated with their respective  
643 density plots. Each colour represents a specific PZA concentration. **(B)** Determination of  
644 absolute changes in Mbv pH-GFP ratio (405/488nm) from upon PZA treatment.  
645 Determination of absolute changes in Mtb pH-GFP ratio (405/488nm) upon various antibiotic  
646 treatment. Mean pH-GFP ratio of each antibiotic treatment was subtracted from the untreated  
647 control 24-hours post-treatment to obtain an absolute value reflecting antibiotic-mediated pH  
648 disruption normalized to the control. Results are displayed as box-plots with individuals  
649 replicate data. Black dots were added to highlight the mean of each condition. **(C-D)** Human  
650 macrophages were infected with fluorescent Mbv for 24 hours and subsequently treated with  
651 increasing concentrations of PZA ranging from 0-400 mg/L for 72 hours. **(C)** Quantitative  
652 analysis of fluorescent Mtb strains replication at the single cell level within MDM treated with  
653 increasing concentrations of PZA. Normalization was done to the mean Mbv area per cell  
654 pre-treatment ( $t_{24h}$  post-infection) and the control condition without PZA was used as  
655 reference corresponding to 100 % growth. Results are displayed as box-plots with individuals'  
656 raw data. Black dots were added to highlight the mean of each condition. Between 4072 and  
657 4628 Mbv-infected MDM were analysed by high-content single-cell microscopy and results  
658 are representative from  $n = 2$  biologically independent experiments performed at least in two-  
659 three technical replicates. **(D)** Determination of PZA  $EC_{50}$  for the Mbv strain by performing a  
660 4-parameter nonlinear logistic regression of the data displayed in **(C)**. **(E)** Representative  
661 fluorescence ratiometric images of Mbv-infected MDM infected for 24 hours and further  
662 treated for 24 hours with increasing concentrations of PZA. Ratiometric signal is displayed as  
663 a 16-colour palette ranging from 0 to 1.6 units. Scale bar corresponds to 50  $\mu$ m. Micrographs  
664 are representative of 2 independent experiments. **(F)** Representative confocal fluorescence  
665 images of Mbv-infected MDM for 24 hours and further treated for 72 hours with increasing  
666 concentrations of PZA. Magnifications display nuclear staining (blue) and fluorescent Mbv

667 (green). Scale bar corresponds to 50  $\mu\text{m}$ . Micrographs are representative of 2 independent  
668 experiments.

669 **STAR ★ Methods**

670 **Key Resources Table**

| REAGENT or RESOURCE                                  | SOURCE                                   | IDENTIFIER      |
|------------------------------------------------------|------------------------------------------|-----------------|
| <b>Bacterial and virus strains</b>                   |                                          |                 |
| E. coli Mach1™ Competent Cells                       | Thermo Fischer                           | Cat#C862003     |
| Mtb H37Rv                                            | Laboratory of Douglas B. Young           | N/A             |
| Mtb H37Rv ΔRD1                                       | Laboratory of William R. Jacobs Jr       | N/A             |
| Mtb H37Rv ΔesxB                                      | Laboratory of Maximiliano G. Gutierrez   | N/A             |
| Mtb H37Rv ΔesxB::esxB                                | Laboratory of Maximiliano G. Gutierrez   | N/A             |
| <i>M. bovis</i> AF2122/97                            | Laboratory of Stephen V. Gordon          | N/A             |
| Mtb H37Rv E2-Crimson                                 | ( <a href="#">Bernard et al., 2020</a> ) | N/A             |
| Mtb H37Rv ΔRD1 E2-Crimson                            | ( <a href="#">Bernard et al., 2020</a> ) | N/A             |
| Mtb H37Rv ΔesxB E2-Crimson                           | Laboratory of Maximiliano G. Gutierrez   | N/A             |
| Mtb H37Rv ΔesxB::esxB E2-Crimson                     | Laboratory of Maximiliano G. Gutierrez   | N/A             |
| Mtb H37Rv pH-GFP                                     | This study                               | N/A             |
| Mtb H37Rv ΔRD1 pH-GFP                                | This study                               | N/A             |
| Mtb H37Rv ΔesxB pH-GFP                               | This study                               | N/A             |
| <i>M. bovis</i> AF2122/97 pH-GFP                     | This study                               | N/A             |
| <i>M. bovis</i> AF2122/97 RFP                        | ( <a href="#">Queval et al., 2021</a> )  | N/A             |
| <b>Biological samples</b>                            |                                          |                 |
| Leukocyte cones (NC24)                               | UK NHS Blood and Transplant service      | N/A             |
| <b>Chemicals, peptides, and recombinant proteins</b> |                                          |                 |
| Ficoll-Paque Premium                                 | GE Healthcare                            | Cat#17-5442-03  |
| MACS rinsing solution                                | Miltenyi                                 | Cat#130-091-222 |
| RBC lysing buffer                                    | Sigma                                    | Cat#R7757       |
| MACS BSA solution                                    | Miltenyi                                 | Cat#130-091-376 |
| anti-CD14 magnetic beads                             | Miltenyi                                 | Cat#130-050-201 |
| Complete RPMI 1640 with GlutaMAX and HEPES           | Gibco                                    | Cat#72400-02    |
| Foetal bovine serum                                  | Sigma                                    | Cat#F7524       |
| Versene                                              | Gibco                                    | Cat#15040066    |
| hGM-CSF                                              | Miltenyi                                 | Cat#130-093-867 |
| hM-CSF                                               | Peptotech                                | Cat#300-25      |
| hIL-3                                                | Peptotech                                | Cat#200-03      |
| hBMP4                                                | Peptotech                                | Cat#120-05      |
| hVEGF                                                | Peptotech                                | Cat#100-20      |
| hSCF                                                 | Peptotech                                | Cat#300-07      |
| XVIVO15                                              | Lonza                                    | Cat#BEBP02-061Q |
| Glutamax                                             | Gibco                                    | Cat#35050061    |
| β-mercaptoethanol                                    | Gibco                                    | Cat#21985023    |
| Essential 8™ Medium                                  | Gibco                                    | Cat#A1517001    |
| Vitronectin XF                                       | StemCell Technologies                    | Cat#100-0763    |
| Y-27632 ROCK inhibitor                               | Stem Cell Technologies                   | Cat#72307       |
| Middlebrook's 7H9 broth medium                       | Sigma-Aldrich                            | Cat#M0178       |
| Glycerol                                             | Fisher Chemical                          | Cat#G/0650/17   |
| Tween-80                                             | Sigma-Aldrich                            | Cat#P1754       |
| Sodium pyruvate                                      | Sigma-Aldrich                            | Cat#P2256       |
| Middlebrook's 7H11 agar medium                       | Sigma-Aldrich                            | Cat#M0428       |
| Middlebrook OADC                                     | BD Biosciences                           | Cat#212351      |
| Middlebrook ADC                                      | BD Biosciences                           | Cat#212352      |

|                                               |                                             |                                                                                                                                                                   |
|-----------------------------------------------|---------------------------------------------|-------------------------------------------------------------------------------------------------------------------------------------------------------------------|
| Hygromycin B                                  | Invitrogen                                  | Cat#10687010                                                                                                                                                      |
| Kanamycin                                     | Sigma-Aldrich                               | Cat#K1876                                                                                                                                                         |
| Zeocin                                        | Gibco                                       | Cat#R25001                                                                                                                                                        |
| Bedaquiline                                   | MedChemExpress                              | Cat#HY-14881                                                                                                                                                      |
| Rifampicin                                    | LKT laboratories                            | Cat#R3220                                                                                                                                                         |
| Pyrazinamide                                  | Sigma-Aldrich                               | Cat#P7136                                                                                                                                                         |
| Isoniazid                                     | Sigma-Aldrich                               | Cat#I3377                                                                                                                                                         |
| Concanamycin A                                | Sigma-Aldrich                               | Cat#C9705                                                                                                                                                         |
| LysoTracker™ Red DND-99                       | Invitrogen                                  | Cat#L7528                                                                                                                                                         |
| NucRed™ Live 647 ReadyProbes™                 | Invitrogen                                  | Cat#R37106                                                                                                                                                        |
| DAPI                                          | Life Technologies                           | Cat#D1306                                                                                                                                                         |
| Methanol-free paraformaldehyde                | Electron Microscopy Sciences                | Cat#15710                                                                                                                                                         |
| <b>Deposited data</b>                         |                                             |                                                                                                                                                                   |
| -                                             | -                                           | -                                                                                                                                                                 |
| <b>Experimental models: Cell lines</b>        |                                             |                                                                                                                                                                   |
| Human: HPSI0114i-kolf_2 iPSC                  | Public Health England Culture Collections   | Cat #77650100                                                                                                                                                     |
| <b>Experimental models: Organisms/strains</b> |                                             |                                                                                                                                                                   |
| -                                             | -                                           | -                                                                                                                                                                 |
| <b>Oligonucleotides</b>                       |                                             |                                                                                                                                                                   |
| -                                             | -                                           | -                                                                                                                                                                 |
| <b>Recombinant DNA</b>                        |                                             |                                                                                                                                                                   |
| Plasmid: pTEC19                               | ( <a href="#">Takaki et al., 2013</a> )     | Addgene #30178                                                                                                                                                    |
| Plasmid: pUV15-pHGFP                          | ( <a href="#">Vandal et al., 2008</a> )     | Addgene #70045                                                                                                                                                    |
| Plasmid: pMS6K-Psmyc-esxBA                    | This study                                  | N/A                                                                                                                                                               |
| Plasmid: pML2570 (RFP)                        | ( <a href="#">Queval et al., 2021</a> )     | N/A                                                                                                                                                               |
| <b>Software and algorithms</b>                |                                             |                                                                                                                                                                   |
| Harmony 4.9                                   | PerkinElmer                                 | <a href="https://www.perkinelmer.com/product/harmony-4-9-office-license-hh17000010">https://www.perkinelmer.com/product/harmony-4-9-office-license-hh17000010</a> |
| RStudio, version 1.3.1073                     | RStudio                                     | <a href="https://www.rstudio.com/">https://www.rstudio.com/</a>                                                                                                   |
| R                                             | The R Project for Statistical Computing     | <a href="https://www.r-project.org/">https://www.r-project.org/</a>                                                                                               |
| Fiji/ImageJ                                   | ( <a href="#">Schindelin et al., 2012</a> ) | <a href="https://imagej.net/software/fiji/">https://imagej.net/software/fiji/</a>                                                                                 |
| <b>Other</b>                                  |                                             |                                                                                                                                                                   |
| LS column                                     | Miltenyi                                    | Cat#130-042-401                                                                                                                                                   |
| QuadroMACS separator magnet                   | Miltenyi                                    | Cat#130-090-976                                                                                                                                                   |
| Cell scrapers                                 | Sarsted                                     | Cat#83.1830                                                                                                                                                       |
| Dual-chamber cell counting slides             | BioRad                                      | Cat#1450016                                                                                                                                                       |
| AggreWell 800 plates                          | StemCell Technologies                       | Cat#34815                                                                                                                                                         |
| Microscopy glass bottom WillCo-dish®          | WillCoWells                                 | Cat#GWST-3512                                                                                                                                                     |
| PerkinElmer olefin-bottomed 96-well plate     | PerkinElmer                                 | Cat#6055302                                                                                                                                                       |

672 **Resource availability**

673 **Lead contact**

674 Further information and requests for resources and reagents should be directed to and will  
675 be fulfilled by the lead contact, Maximiliano G. Gutierrez ([max.g@crick.ac.uk](mailto:max.g@crick.ac.uk)).

676 **Materials availability**

677 All unique or stable reagents generated in this study are available from the lead contact upon  
678 reasonable request. Availability of materials might be subjected to Materials Transfer  
679 Agreement (MTA) establishment.

680 **Data and code availability**

681 All data reported in this paper will be shared by the lead contact upon reasonable request.  
682 This paper does not report original code.

683



## 684 **Experimental model and subject details**

### 685 **Mycobacterial strains and culture conditions**

686 *Mycobacterium tuberculosis* (Mtb) H37Rv and  $\Delta$ RD1 strains were obtained from William R.  
687 Jacobs Jr. (Albert Einstein College of Medicine, New-York, USA), Suzie Hingley-Wilson  
688 (University of Surrey, Guilford, UK) and Douglas B. Young (The Francis Crick Institute,  
689 London, UK). *Mycobacterium bovis* AF2122/97 (Mbv) reference strain was provided Stephen  
690 V. Gordon (University College Dublin, Dublin, Ireland). Mtb  $\Delta$ esxB mutant was generated in  
691 our laboratory by using the ORBIT system, genetically mapped by PCR and sequenced  
692 ([Aylan et al., in preparation](#)). Its respective complement Mtb  $\Delta$ esxB::esxB was generated  
693 by transformation with a mycobacterial kanamycin resistant integrative vector carrying a  
694 functional copy of esxB genes under the control of the Psmc promoter ([Aylan et al.,](#)  
695 [in preparation](#)). Both clones did not show any growth impairment *in vitro* and were validated  
696 based on ESAT-6 and CFP-10 production and secretion by conventional immunoblot ([Aylan](#)  
697 [et al., in preparation](#)). Recombinant Mtb or Mbv strains expressing pH-GFP (pUV15-pHGFP;  
698 Addgene Plasmid #70045, kindly gifted by Sabine Ehrh), RFP (pML2570) or E2-Crimson  
699 (pTEC19, Addgene Plasmid #30178, kindly gifted by Lalita Ramakrishnan) fluorescent  
700 proteins were generated by electroporation and further selected onto appropriate medium.  
701 Recombinant Mtb strains were grown in Middlebrook 7H9 broth supplemented with 0.2%  
702 glycerol (v/v) (Fisher Chemical, G/0650/17), 0.05% Tween-80 (v/v) (Sigma-Aldrich, P1754)  
703 and 10% ADC (v/v) (BD Biosciences, 212352) whereas recombinant Mbv strains expressing  
704 pH-GFP or RFP fluorescent protein were grown in 7H9 Middlebrook supplemented with  
705 40 mM sodium pyruvate (Sigma-Aldrich, P2256). Bacterial cultures (10 mL) were incubated  
706 under constant rotation in 50 mL conical tubes at 37°C. Hygromycin B (Invitrogen,  
707 10687010), kanamycin (Sigma-Aldrich, K1876) or zeocin (Invivogen, ant-zn-05) were used  
708 as a selection marker for the fluorescent strains at a concentration of 50 mg/L, 25 mg/L and  
709 25 mg/L respectively. All selected clones were tested for PDIM positivity by thin layer  
710 chromatography of lipid extracts from cultures prior to performing infection experiments.

### 711 **Preparation and culture of human-monocyte derived macrophages**

712 Human monocyte-derived macrophages (MDM) were prepared from Leukocyte cones  
713 (NC24) supplied by the NHS Blood and Transplant service as previously described  
714 ([Greenwood et al., 2019](#); [Lerner et al., 2017](#); [Santucci et al., 2021](#)). Briefly, white blood cells  
715 were isolated by centrifugation on Ficoll-Paque Premium (GE Healthcare, 17-5442-03) for

716 60 min at 300 g. Mononuclear cells were collected and washed twice with MACS rinsing  
717 solution (Miltenyi, 130-091-222). Cells were subsequently incubated with 10 mL RBC lysing  
718 buffer (Sigma, R7757) at room temperature. After 10 min, cells were washed with rinsing  
719 buffer and then were re-suspended in 80  $\mu$ L MACS rinsing solution supplemented with 1%  
720 BSA (Miltenyi, 130-091-376) (MACS/BSA) and 20  $\mu$ L anti-CD14 magnetic beads (Miltenyi,  
721 130-050-201) per approximately  $10^8$  cells. After 20 min at 4°C, cells were washed in  
722 MACS/BSA solution and re-suspended at a concentration of  $2 \cdot 10^8$  cells/mL in MACS/BSA  
723 and further passed through a pre-equilibrated LS column (Miltenyi, 130-042-401) in the field  
724 of a QuadroMACS separator magnet (Miltenyi, 130-090-976). The LS column was washed  
725 three times with MACS/BSA solution, then CD14 positive cells were eluted, centrifuged and  
726 re-suspended in complete RPMI 1640 with GlutaMAX and HEPES (Gibco, 72400-02), 10%  
727 foetal bovine serum (Sigma, F7524) containing 10 ng/ml of hGM-CSF (Miltenyi, 130-093-  
728 867). Differentiation was performed by plating approximately  $10^6$  cells/mL in untreated petri  
729 dishes and further incubated in a humidified 37°C incubator with 5% CO<sub>2</sub>. After three days,  
730 an equal volume of fresh complete media including hGM-CSF was added. Six days after the  
731 initial isolation, differentiated macrophages were detached in 0.5 mM EDTA in ice-cold PBS  
732 using cell scrapers (Sarsted, 83.1830), pelleted by centrifugation and re-suspended in  
733 complete RPMI 1640 medium containing 10% foetal bovine serum where cell count and  
734 viability was estimated (BioRad, TC20™ Automated Cell Counter) before plating for  
735 experiments.

### 736 **Human-induced pluripotent stem cells culture and human induced pluripotent stem** 737 **cells-derived macrophages preparation**

738 Human iPSC maintenance and IPSCDM preparation was performed as recently reported  
739 ([Bernard et al., 2020](#)). Briefly, KOLF2 IPSC (HPSI0114i-kolf\_2 iPSC, Public Health England  
740 Culture Collections, Cat #77650100) were maintained in Vitronectin XF (StemCell  
741 Technologies, #100-0763) coated plates with E8 medium (ThermoFisher Scientific,  
742 A1517001) in a humidified 37°C incubator with 5% CO<sub>2</sub>. Cells were passaged by performing  
743 a 1/6 dilution when reaching approximately 70% confluency using Versene (Gibco,  
744 15040066). Monocyte factories were set up following a previously reported protocol ([van  
745 Wilgenburg et al., 2013](#)). A single cell suspension of iPSC was generated in E8 medium  
746 containing 10  $\mu$ M Y-27632 ROCK inhibitor (Stem Cell Technologies, # 72307) and seeded  
747 into AggreWell 800 plates (StemCell Technologies, # 34815) with approximately  $4 \times 10^6$   
748 cells/well and centrifuged at 100 g for 5 min. The forming embryonic bodies (EB) were fed

749 daily with two 50 % medium changes with E8 medium supplemented with 50 ng/ml hBMP4  
750 (Peprtech, 120-05ET), 50 ng/ml hVEGF (Peprtech, 100-20) and 20 ng/ml hSCF  
751 (Peprtech, 300-07) for 3 days. On day 4, the EBs were harvested by flushing out of the well  
752 with gentle pipetting and filtered through an inverted 40 µm cell strainer. EBs were seeded at  
753 250–300 per T225 flask in factory medium consisting of X-VIVO 15 (Lonza, BE02-061Q)  
754 supplemented with Glutamax (Gibco, 35050061), 50 µM β-mercaptoethanol (Gibco,  
755 21985023), 100 ng/ml hM-CSF (Peprtech, 300-25) and 25 ng/ml hIL-3 (Peprtech, 200-03).  
756 Monocyte factories were fed once per week with factory medium for 4-5 weeks until monocyte  
757 production was observed in the supernatant. Up to 50% of the supernatant was harvested  
758 weekly and factories fed with 20-30 ml factory medium. For differentiation, the supernatant  
759 was centrifuged and cells resuspended in X-VIVO 15 supplemented with Glutamax and  
760 20 ng/ml hGM-CSF and plated at  $12 \times 10^6$  cells per 15 cm petri dish to differentiate over  
761 7 days, where a 50% medium change was performed on day 4. Seven days after the initial  
762 plating, differentiated macrophages were detached with Versene (Gibco, 15040066) for  
763 15 min at 37°C and 5% CO<sub>2</sub>. Versene was further diluted 1:3 with PBS and cells were gently  
764 detached with cell scrapers (Sarsted, 83.1830), pelleted by centrifugation and re-suspended  
765 in X-VIVO 15 plus Glutamax where cell count and viability were estimated (BioRad, TC20™  
766 Automated Cell Counter) before plating for experiments.

767

## 768 **Methods details**

### 769 **Macrophage infection with Mtb and Mbv strains**

770 For macrophage infection, mycobacterial inoculum was prepared following a well-established  
771 procedure ([Lerner et al., 2017](#); [Schnettger et al., 2017](#)). First, bacterial cultures were pelleted  
772 by centrifuging approximately 10 mL of mid-exponential phase cultures ( $OD_{600nm} = 0.6 \pm 0.2$ )  
773 at 4000 rpm for 5 min. Pellets were washed twice in sterile PBS buffer (pH 7.4), then, an  
774 equivalent volume of sterile 2.5-3.5 mm autoclaved glass beads was added to individual pellet  
775 and bacterial clumps were disrupted by vigorously shaking. Bacteria were re-suspended in  
776 the appropriate cell culture media and the clumps were removed by slow-speed centrifugation  
777 at 1200 rpm for 5 min. The supernatant containing the bacterial suspension of interest was  
778 transferred to a fresh tube and  $OD_{600nm}$  was measured to determine bacterial concentration.  
779 In this protocol, it was assumed that an  $OD_{600nm}$  of 1 approximates to  $10^8$  bacteria/mL. For  
780 high-content dual imaging experiments and intracellular antibiotic assays, macrophages were  
781 infected with mycobacterial strains at a multiplicity of infection (MOI) of 1 for 2 h at 37°C. After  
782 2 h of uptake, cells were washed with PBS to remove extracellular bacteria and fresh media  
783 was added.

### 784 **High-content dual-live fluorescence imaging, determination of Mtb intrabacterial pH- 785 GFP fluorescence ratio and Mtb-associated LysoTracker intensity**

786 For high-content live-cell imaging, cells were infected with fluorescent mycobacteria  
787 producing ratiometric pH-GFP at a MOI of 1 as described above. After, 24 hours the culture  
788 media was replaced by fresh medium only or fresh medium containing 50 nM ConA (Sigma-  
789 Aldrich, C9705) for IPSDM and 100 nM ConA for MDM. After 24 hours, infected cells were  
790 washed once with PBS buffer (pH 7.4) and stained with complete medium containing 200 nM  
791 LysoTracker™ Red DND-99 (Invitrogen, L7528) in a humidified 37°C incubator with 5% CO<sub>2</sub>.  
792 After 30 min, staining medium was removed and replaced with fresh medium containing  
793 NucRed™ Live 647 ReadyProbes™ (Invitrogen, R37106) following the manufacturer  
794 recommendations to facilitate cell detection. Live-cell imaging was further performed using  
795 the OPERA Phenix microscope with a 63x water-immersion objective. Image acquisition was  
796 performed with the confocal mode using the default autofocus function and a binning of 1.  
797 Mtb pH-GFP signal was detected using  $\lambda_{ex}$  405 nm/ $\lambda_{em}$  500-550 nm and  
798  $\lambda_{ex}$  488nm/ $\lambda_{em}$  500-550 nm, LysoTracker signal was detected  $\lambda_{ex}$  561 nm/ $\lambda_{em}$  570-  
799 630 nm and NucRed Live signal  $\lambda_{ex}$  640 nm/ $\lambda_{em}$  650-760 nm. Laser power for all channels

800 were set between 20% and 30% with an exposure time of 200 ms. Each channel was imaged  
801 independently and a minimum of 3 to 4 distinct focal z-planes spaced with 0.5-1  $\mu\text{m}$  were  
802 acquired. Multiple fields of view ( $323 \mu\text{m} \times 323 \mu\text{m}$ ) from each individual well were imaged  
803 with a set overlap of 10 % in between fields. Segmentation and analysis were performed  
804 using the Harmony software (Perkin Elmer, version 4.9). Briefly, cellular region was detected  
805 based on the fluorescent signals in the far-red emission channel using the “Find Image  
806 Region” building block and the “Absolute Threshold” function. Intracellular Mtb pH-GFP were  
807 detected based on the GFP signal obtained into both  $\lambda_{\text{ex}} 405 \text{ nm}/\lambda_{\text{em}} 500\text{-}550 \text{ nm}$  and  
808  $\lambda_{\text{ex}} 488\text{nm}/\lambda_{\text{em}} 500\text{-}550 \text{ nm}$  channels using the “Find Image Region” building block and the  
809 “Absolute Threshold” function. Signal from both GFP channels were merged using the  
810 “Calculate Image” building block and the function “By Formula” were a channel A + B  
811 operation was applied. This combined image was filtered to reduce background noise using  
812 the “Filter Image” building block and a sliding parabola function. This Mtb mask was used to  
813 quantify Mtb pH-GFP mean fluorescent signal per single object from both 405nm/510nm and  
814 488nm/510nm channels. Ratiometric signal were obtained by dividing the mean intensity  
815 quantified at  $\lambda_{\text{ex}} 405 \text{ nm}/\lambda_{\text{em}} 500\text{-}550 \text{ nm}$  by the one obtained at  $\lambda_{\text{ex}} 488\text{nm}/\lambda_{\text{em}} 500\text{-}$   
816  $550 \text{ nm}$  for each object. To quantify Mtb-associated LysoTracker intensity, the Mtb mask was  
817 slightly extended using the “Find Surrounding Region” building block using the Method A with  
818 an individual threshold value of 0.8 and conservation of the input region. When assessing the  
819 spatiotemporal mode of action of PZA, human macrophages were infected for 24 hours and  
820 further treated with increasing concentration of PZA ranging from 0 to 400 mg/L in the  
821 absence or presence of ConA for additional 4-, 16-, 24- or 72 hours before acquisition was  
822 performed as describe above. When assessing anti-TB drug-mediated pH-disruption, Mtb-  
823 infected cells were left untreated or pulsed with PZA (100 mg/L), BDQ (2.5 mg/L), INH  
824 (5 mg/L) or RIF (5 mg/L) for 24 hours before imaging. Determination of absolute changes of  
825 pH-GFP ratio relative to the control condition (also referred as  $\Delta_{\text{intrabacterial pH}}$ ) was done  
826 by subtracting the value obtained in each experimental condition to its corresponding control  
827 condition. All the results were exported as CSV files, imported in the R studio software (The  
828 R Project for Statistical Computing, version 1.3.1073) and most of the graphs, displayed as  
829 boxplot, scatter plots or raincloud plots, were plotted with the ggplot2 package (version 3.3.2).

### 830 **Low-content dual-live fluorescence imaging and live-cell imaging**

831 For low-content dual imaging and live-cell imaging, experimental set up and acquisition was  
832 performed as previously described ([Bernard et al., 2020](#); [Schnettger and Gutierrez, 2017](#);



833 [Schnettger et al., 2017](#)) with slight modifications. Approximately  $1 \times 10^6$  IPSDM were seeded  
834 within 12 mm aperture glass bottom dishes (WillCo-dish®, GWST-3512) in 1 mL of X-VIVO  
835 15 media plus Glutamax. Adherent cells were infected with fluorescent Mtb producing  
836 ratiometric pH-GFP at a MOI of 1 as described above and after 24 hours of infection medium  
837 was replaced with complete medium containing 200 nM LysoTracker™ Red DND-99  
838 (Invitrogen, L7528). The dish was placed on a custom-made 35 mm dish holder and further  
839 incubated in a humidified 37°C incubator with 5% CO<sub>2</sub>. After 30 min of staining, dish was set  
840 under a Leica SP5 laser scanning confocal microscope (Leica Biosystems) in an  
841 environmental control chamber providing 37°C, 5 % CO<sub>2</sub> and 20–30 % humidity for an  
842 additional 1 hour to avoid drifting issues upon acquisition. Image acquisition was performed  
843 with a HC PL APO CS2 63×/1.40 oil objective. Images of 1024 × 1024 pixels were acquired  
844 with Diode 405 nm, Argon 488 nm and DPSS 561 nm lasers where intensities were set up  
845 as 2%, 8% and 8% respectively. Emitted signal was collected at  $\lambda_{em} 510 \pm 30$  nm and  
846  $\lambda_{em} 585 \pm 15$  nm for pH-GFP and LysoTracker channels respectively. One single Z-plane  
847 was acquired for each field and a minimum of 5 fields per biological sample were imaged.  
848 Determination of the Mtb pH-GFP ratio and Mtb-associated LysoTracker mean intensity  
849 values were performed by manual quantification as previously described ([Bernard et al.,](#)  
850 [2020](#); [Santucci et al., 2021](#)). Briefly, the mROI were duplicated, the bacteria containing  
851 channel was manually thresholded and a single ‘Dilate’ command was applied to generate a  
852 binary mask in Fiji corresponding to the bacteria surrounded by one single ring of pixel. This  
853 mask was then used to measure the mean fluorescence intensity of pixels in  
854  $\lambda_{ex} 405$  nm/ $\lambda_{em} 510 \pm 30$  nm,  $\lambda_{ex} 488$ nm/ $\lambda_{em} 510 \pm 30$  nm and  
855  $\lambda_{ex} 510$  nm/ $\lambda_{em} 585 \pm 15$  nm channels using the command ‘Measure’.

856 For live-cell imaging a very similar experimental set up was used where images were  
857 acquired every 30 min intervals over a time frame of 6 h to minimise photobleaching and  
858 phototoxicity. Same settings were used and 16 z-stacks of approximately 500nm were  
859 performed to catch most of the events contained within Mtb-infected cells. mROI were defined  
860 and tracked manually by selecting the appropriate focal plane over the course of the kinetics  
861 as previously described. Selected planes were then combined together using the  
862 ‘Concatenate’ command in Fiji ([Schnettger and Gutierrez, 2017](#)). Determination of Mtb pH-  
863 GFP and its respective LysoTracker-associated mean intensity was performed as mentioned  
864 above and further analysed overtime. All the results were exported as CSV files, imported in

865 the R studio software (The R Project for Statistical Computing, version 1.3.1073) and the  
866 graphs were plotted with the ggplot2 package (version 3.3.2).

### 867 **Intracellular replication assays in Mtb- and Mbv-infected macrophages**

868 Intracellular replication assays were performed by high-content fluorescence quantitative  
869 imaging as previously described ([Greenwood et al., 2019](#); [Santucci et al., 2021](#)). Briefly, 3.5-  
870  $4.0 \times 10^4$  cells per well were seeded into an olefin-bottomed 96-well plate (Perkin Elmer,  
871 6055302) 16-20 hours prior to infection. Cells were infected as described above with pH-GFP  
872 or E2-Crimson producing strains for 24 hours and the culture media was replaced by fresh  
873 media containing increasing concentrations of PZA, RIF, INH, BDQ or left untreated. When  
874 indicated, fresh medium containing 50 nM ConA for IPSDM and 100 nM ConA for MDM  
875 (Sigma-Aldrich, C9705) was added together with the antibiotics. At the required time points,  
876 infected cells were washed with PBS buffer (pH 7.4) and fixed with a 4% methanol-free  
877 paraformaldehyde (Electron Microscopy Sciences, 15710) in PBS buffer (pH 7.4) for 16-20 h  
878 at 4°C. Fixative was removed and cells were washed in PBS buffer (pH 7.4) before performing  
879 the appropriate nuclear staining using either DAPI (Invitrogen, D1306) or NucRed™ Live 647  
880 ReadyProbes™ (Invitrogen, R37106) for nuclear visualisation. Image acquisition was  
881 performed with the OPERA Phenix high-content microscope with a 40x water-immersion 1.1  
882 NA objective. The confocal mode with default autofocus and a binning of 1 was used to image  
883 multiple fields of view ( $323 \mu\text{m} \times 323 \mu\text{m}$ ) from each individual well with 10% overlapping,  
884 where acquisition was performed at 4 distinct focal planes spaced with 1 or 2  $\mu\text{m}$ . Imaging of  
885 stained nuclei and fluorescent bacteria was done with similar  $\lambda_{\text{ex}}/\lambda_{\text{em}}$  settings as described  
886 above. Analysis was performed using the Harmony software (Perkin Elmer, version 4.9)  
887 where maximum projection of the 3-4 z-planes was used to perform single cell segmentation  
888 by using the “Find nuclei” and “Find cells” building blocks. Cells on the edges were excluded  
889 from the analysis. The fluorescent bacterial signal was detected using the “Find Image  
890 Region” building block where a manual threshold was applied to accurately perform bacterial  
891 segmentation. The Mtb area per cell was determined by quantifying the total area (expressed  
892 in  $\mu\text{m}^2$ ) of GFP<sup>+</sup> or E2-Crimson<sup>+</sup> signal per single macrophage. The relative growth index was  
893 determined by using the following formula  $\sim (\text{Mean Mtb area per cell } t_{96\text{h}} - \text{Mean Mtb area per}$   
894  $\text{cell } t_{24\text{h}}) / (\text{Mean Mtb area per cell } t_{24\text{h}})$  and the relative values were obtained by using the  
895 untreated control as a reference of 100% growth (0% inhibition). All the results were exported  
896 as CSV files, imported in the R studio software (The R Project for Statistical Computing,  
897 version 1.3.1073) and graphs were plotted with the ggplot2 package (version 3.3.2).

898 **Quantification and Statistical analysis**

899 Results displayed were obtained from  $n = 2$ ,  $n = 3$  or  $n = 4$  biologically independent  
900 experiments performed at least each time in two-three technical replicates (unless otherwise  
901 stated). The statistical tests used, the number of biologically independent replicates, the  
902 number of technical replicates and the number of single-cell or single-mROI analysed are  
903 indicated in each figure legend. Statistical analysis by pairwise comparison was performed  
904 using Wilcoxon signed-rank test with the '*wilcox.test()*' function in R where differences were  
905 considered statistically significant when  $p \leq 0.05$ . Statistical analysis is displayed in the figure  
906 as \*  $p \leq 0.05$ ; \*\*  $p \leq 0.01$ ; \*\*\*  $p \leq 0.001$  or alternatively as #  $p \leq 0.05$ ; ##  $p \leq 0.01$ ; ###  $p \leq 0.001$ .  
907 All the  $p$ -values contained in the text or the figures are relative to the control condition (unless  
908 otherwise stated). Spearman rank correlation coefficient ( $r_s$ ) and its corresponding  $p$ -value  
909 were calculated by using the ggpubr R package and assessed by two-tailed statistical  $t$ -test.

910



## 911 References

- 912 Augenstreich, J., Arbues, A., Simeone, R., Haanappel, E., Wegener, A., Sayes, F., Le  
913 Chevalier, F., Chalut, C., Malaga, W., Guilhot, C., et al. (2017). ESX-1 and phthiocerol  
914 dimycocerosates of *Mycobacterium tuberculosis* act in concert to cause phagosomal rupture  
915 and host cell apoptosis. *Cell Microbiol* 19. 10.1111/cmi.12726.
- 916 Barczak, A.K., Avraham, R., Singh, S., Luo, S.S., Zhang, W.R., Bray, M.A., Hinman, A.E.,  
917 Thompson, M., Nietupski, R.M., Golas, A., et al. (2017). Systematic, multiparametric analysis  
918 of *Mycobacterium tuberculosis* intracellular infection offers insight into coordinated virulence.  
919 *PLoS Pathog* 13, e1006363. 10.1371/journal.ppat.1006363.
- 920 Bartek, I.L., Reichlen, M.J., Honaker, R.W., Leistikow, R.L., Clambey, E.T., Scobey, M.S.,  
921 Hinds, A.B., Born, S.E., Covey, C.R., Schurr, M.J., et al. (2016). Antibiotic Bactericidal Activity  
922 Is Countered by Maintaining pH Homeostasis in *Mycobacterium smegmatis*. *mSphere* 1.  
923 10.1128/mSphere.00176-16.
- 924 Bernard, E.M., Fearn, A., Bussi, C., Santucci, P., Peddie, C.J., Lai, R.J., Collinson, L.M.,  
925 and Gutierrez, M.G. (2020). *M. tuberculosis* infection of human iPSDM reveals complex  
926 membrane dynamics during xenophagy evasion. *J Cell Sci*. 10.1242/jcs.252973.
- 927 Brodin, P., Poquet, Y., Levillain, F., Peguillet, I., Larrouy-Maumus, G., Gilleron, M., Ewann,  
928 F., Christophe, T., Fenistein, D., Jang, J., et al. (2010). High content phenotypic cell-based  
929 visual screen identifies *Mycobacterium tuberculosis* acyltrehalose-containing glycolipids  
930 involved in phagosome remodeling. *PLoS Pathog* 6, e1001100.  
931 10.1371/journal.ppat.1001100.
- 932 Bussi, C., and Gutierrez, M.G. (2019). *Mycobacterium tuberculosis* infection of host cells in  
933 space and time. *FEMS Microbiol Rev* 43, 341-361. 10.1093/femsre/fuz006.
- 934 Cadena, A.M., Fortune, S.M., and Flynn, J.L. (2017). Heterogeneity in tuberculosis. *Nat Rev*  
935 *Immunol* 17, 691-702. 10.1038/nri.2017.69.
- 936 Cohen, S.B., Gern, B.H., Delahaye, J.L., Adams, K.N., Plumlee, C.R., Winkler, J.K.,  
937 Sherman, D.R., Gerner, M.Y., and Urdahl, K.B. (2018). Alveolar Macrophages Provide an  
938 Early *Mycobacterium tuberculosis* Niche and Initiate Dissemination. *Cell Host Microbe* 24,  
939 439-446 e434. 10.1016/j.chom.2018.08.001.
- 940 Darby, C.M., Ingolfsson, H.I., Jiang, X., Shen, C., Sun, M., Zhao, N., Burns, K., Liu, G., Ehrt,  
941 S., Warren, J.D., et al. (2013). Whole cell screen for inhibitors of pH homeostasis in  
942 *Mycobacterium tuberculosis*. *PLoS One* 8, e68942. 10.1371/journal.pone.0068942.
- 943 den Hertog, A.L., Menting, S., Pfeldt, R., Warns, M., Siddiqi, S.H., and Anthony, R.M. (2016).  
944 Pyrazinamide Is Active against *Mycobacterium tuberculosis* Cultures at Neutral pH and Low  
945 Temperature. *Antimicrob Agents Chemother* 60, 4956-4960. 10.1128/AAC.00654-16.
- 946 Fontes, F.L., Peters, B.J., Crans, D.C., and Crick, D.C. (2020). The Acid-Base Equilibrium of  
947 Pyrazinoic Acid Drives the pH Dependence of Pyrazinamide-Induced *Mycobacterium*  
948 *tuberculosis* Growth Inhibition. *ACS Infect Dis* 6, 3004-3014. 10.1021/acsinfecdis.0c00507.

- 949 Giraud-Gatineau, A., Coya, J.M., Maure, A., Biton, A., Thomson, M., Bernard, E.M., Marrec,  
950 J., Gutierrez, M.G., Larrouy-Maumus, G., Brosch, R., et al. (2020). The antibiotic bedaquiline  
951 activates host macrophage innate immune resistance to bacterial infection. *Elife* 9.  
952 10.7554/eLife.55692.
- 953 Goode, O., Smith, A., Zarkan, A., Cama, J., Invergo, B.M., Belgami, D., Cano-Muniz, S.,  
954 Metz, J., O'Neill, P., Jeffries, A., et al. (2021). Persister *Escherichia coli* Cells Have a Lower  
955 Intracellular pH than Susceptible Cells but Maintain Their pH in Response to Antibiotic  
956 Treatment. *mBio* 12, e0090921. 10.1128/mBio.00909-21.
- 957 Gopal, P., Gruber, G., Dartois, V., and Dick, T. (2019). Pharmacological and Molecular  
958 Mechanisms Behind the Sterilizing Activity of Pyrazinamide. *Trends Pharmacol Sci* 40, 930-  
959 940. 10.1016/j.tips.2019.10.005.
- 960 Gopal, P., Sarathy, J.P., Yee, M., Ragunathan, P., Shin, J., Bhushan, S., Zhu, J., Akopian,  
961 T., Kandror, O., Lim, T.K., et al. (2020). Pyrazinamide triggers degradation of its target  
962 aspartate decarboxylase. *Nat Commun* 11, 1661. 10.1038/s41467-020-15516-1.
- 963 Gopal, P., Yee, M., Sarathy, J., Low, J.L., Sarathy, J.P., Kaya, F., Dartois, V., Gengenbacher,  
964 M., and Dick, T. (2016). Pyrazinamide Resistance Is Caused by Two Distinct Mechanisms:  
965 Prevention of Coenzyme A Depletion and Loss of Virulence Factor Synthesis. *ACS Infect Dis*  
966 2, 616-626. 10.1021/acsinfecdis.6b00070.
- 967 Greenwood, D.J., Dos Santos, M.S., Huang, S., Russell, M.R.G., Collinson, L.M., MacRae,  
968 J.I., West, A., Jiang, H., and Gutierrez, M.G. (2019). Subcellular antibiotic visualization  
969 reveals a dynamic drug reservoir in infected macrophages. *Science* 364, 1279-1282.  
970 10.1126/science.aat9689.
- 971 Gulbay, B.E., Gurkan, O.U., Yildiz, O.A., Onen, Z.P., Erkekol, F.O., Baccioglu, A., and Acican,  
972 T. (2006). Side effects due to primary antituberculosis drugs during the initial phase of therapy  
973 in 1149 hospitalized patients for tuberculosis. *Respir Med* 100, 1834-1842.  
974 10.1016/j.rmed.2006.01.014.
- 975 Hards, K., McMillan, D.G.G., Schurig-Briccio, L.A., Gennis, R.B., Lill, H., Bald, D., and Cook,  
976 G.M. (2018). Ionophoric effects of the antitubercular drug bedaquiline. *Proc Natl Acad Sci U*  
977 *S A* 115, 7326-7331. 10.1073/pnas.1803723115.
- 978 Huang, L., Nazarova, E.V., and Russell, D.G. (2019). *Mycobacterium tuberculosis*: Bacterial  
979 Fitness within the Host Macrophage. *Microbiol Spectr* 7. 10.1128/microbiolspec.BAI-0001-  
980 2019.
- 981 Huss, M., Ingenhorst, G., Konig, S., Gassel, M., Droese, S., Zeeck, A., Altendorf, K., and  
982 Wieczorek, H. (2002). Concanamycin A, the specific inhibitor of V-ATPases, binds to the V(o)  
983 subunit c. *J Biol Chem* 277, 40544-40548. 10.1074/jbc.M207345200.
- 984 Krulwich, T.A., Sachs, G., and Padan, E. (2011). Molecular aspects of bacterial pH sensing  
985 and homeostasis. *Nat Rev Microbiol* 9, 330-343. 10.1038/nrmicro2549.
- 986 Lamont, E.A., Dillon, N.A., and Baughn, A.D. (2020). The Bewildering Antitubercular Action  
987 of Pyrazinamide. *Microbiol Mol Biol Rev* 84. 10.1128/MMBR.00070-19.

- 988 Lenaerts, A., Barry, C.E., 3rd, and Dartois, V. (2015). Heterogeneity in tuberculosis  
989 pathology, microenvironments and therapeutic responses. *Immunol Rev* 264, 288-307.  
990 10.1111/imr.12252.
- 991 Lerner, T.R., Borel, S., Greenwood, D.J., Repnik, U., Russell, M.R., Herbst, S., Jones, M.L.,  
992 Collinson, L.M., Griffiths, G., and Gutierrez, M.G. (2017). Mycobacterium tuberculosis  
993 replicates within necrotic human macrophages. *J Cell Biol* 216, 583-594.  
994 10.1083/jcb.201603040.
- 995 Lerner, T.R., Queval, C.J., Fearn, A., Repnik, U., Griffiths, G., and Gutierrez, M.G. (2018).  
996 Phthiocerol dimycocerosates promote access to the cytosol and intracellular burden of  
997 Mycobacterium tuberculosis in lymphatic endothelial cells. *BMC Biol* 16, 1. 10.1186/s12915-  
998 017-0471-6.
- 999 Levitte, S., Adams, K.N., Berg, R.D., Cosma, C.L., Urdahl, K.B., and Ramakrishnan, L.  
1000 (2016). Mycobacterial Acid Tolerance Enables Phagolysosomal Survival and Establishment  
1001 of Tuberculous Infection In Vivo. *Cell Host Microbe* 20, 250-258.  
1002 10.1016/j.chom.2016.07.007.
- 1003 Liu, Y., Tan, S., Huang, L., Abramovitch, R.B., Rohde, K.H., Zimmerman, M.D., Chen, C.,  
1004 Dartois, V., VanderVen, B.C., and Russell, D.G. (2016). Immune activation of the host cell  
1005 induces drug tolerance in Mycobacterium tuberculosis both in vitro and in vivo. *J Exp Med*  
1006 213, 809-825. 10.1084/jem.20151248.
- 1007 MacGurn, J.A., and Cox, J.S. (2007). A genetic screen for Mycobacterium tuberculosis  
1008 mutants defective for phagosome maturation arrest identifies components of the ESX-1  
1009 secretion system. *Infect Immun* 75, 2668-2678. 10.1128/IAI.01872-06.
- 1010 Malone, L., Schurr, A., Lindh, H., Mc, K.D., Kiser, J.S., and Williams, J.H. (1952). The effect  
1011 of pyrazinamide (aldinamide) on experimental tuberculosis in mice. *Am Rev Tuberc* 65, 511-  
1012 518.
- 1013 Mc, D.W., and Tompsett, R. (1954). Activation of pyrazinamide and nicotinamide in acidic  
1014 environments in vitro. *Am Rev Tuberc* 70, 748-754. 10.1164/art.1954.70.4.748.
- 1015 Peterson, N.D., Rosen, B.C., Dillon, N.A., and Baughn, A.D. (2015). Uncoupling  
1016 Environmental pH and Intrabacterial Acidification from Pyrazinamide Susceptibility in  
1017 Mycobacterium tuberculosis. *Antimicrob Agents Chemother* 59, 7320-7326.  
1018 10.1128/AAC.00967-15.
- 1019 Pethe, K., Swenson, D.L., Alonso, S., Anderson, J., Wang, C., and Russell, D.G. (2004).  
1020 Isolation of Mycobacterium tuberculosis mutants defective in the arrest of phagosome  
1021 maturation. *Proc Natl Acad Sci U S A* 101, 13642-13647. 10.1073/pnas.0401657101.
- 1022 Petrella, S., Gelus-Ziental, N., Maudry, A., Laurans, C., Boudjelloul, R., and Sougakoff, W.  
1023 (2011). Crystal structure of the pyrazinamidase of Mycobacterium tuberculosis: insights into  
1024 natural and acquired resistance to pyrazinamide. *PLoS One* 6, e15785.  
1025 10.1371/journal.pone.0015785.

- 1026 Queval, C.J., Fearn, A., Botella, L., Smyth, A., Schnettger, L., Mitermite, M., Wooff, E.,  
1027 Villarreal-Ramos, B., Garcia-Jimenez, W., Heunis, T., et al. (2021). Macrophage-specific  
1028 responses to human- and animal-adapted tubercle bacilli reveal pathogen and host factors  
1029 driving multinucleated cell formation. *PLoS Pathog* 17, e1009410.  
1030 [10.1371/journal.ppat.1009410](https://doi.org/10.1371/journal.ppat.1009410).
- 1031 Quigley, J., Hughitt, V.K., Velikovskiy, C.A., Mariuzza, R.A., El-Sayed, N.M., and Briken, V.  
1032 (2017). The Cell Wall Lipid PDIM Contributes to Phagosomal Escape and Host Cell Exit of  
1033 *Mycobacterium tuberculosis*. *mBio* 8. [10.1128/mBio.00148-17](https://doi.org/10.1128/mBio.00148-17).
- 1034 Richter, M.F., Drown, B.S., Riley, A.P., Garcia, A., Shirai, T., Svec, R.L., and Hergenrother,  
1035 P.J. (2017). Predictive compound accumulation rules yield a broad-spectrum antibiotic.  
1036 *Nature* 545, 299-304. [10.1038/nature22308](https://doi.org/10.1038/nature22308).
- 1037 Rohde, K., Yates, R.M., Purdy, G.E., and Russell, D.G. (2007). *Mycobacterium tuberculosis*  
1038 and the environment within the phagosome. *Immunol Rev* 219, 37-54. [10.1111/j.1600-065X.2007.00547.x](https://doi.org/10.1111/j.1600-065X.2007.00547.x).
- 1040 Santucci, P., Greenwood, D.J., Fearn, A., Chen, K., Jiang, H., and Gutierrez, M.G. (2021).  
1041 Intracellular localisation of *Mycobacterium tuberculosis* affects efficacy of the antibiotic  
1042 pyrazinamide. *Nat Commun* 12, 3816. [10.1038/s41467-021-24127-3](https://doi.org/10.1038/s41467-021-24127-3).
- 1043 Schindelin, J., Arganda-Carreras, I., Frise, E., Kaynig, V., Longair, M., Pietzsch, T., Preibisch,  
1044 S., Rueden, C., Saalfeld, S., Schmid, B., et al. (2012). Fiji: an open-source platform for  
1045 biological-image analysis. *Nat Methods* 9, 676-682. [10.1038/nmeth.2019](https://doi.org/10.1038/nmeth.2019).
- 1046 Schnettger, L., and Gutierrez, M.G. (2017). Quantitative Spatiotemporal Analysis of  
1047 Phagosome Maturation in Live Cells. *Methods Mol Biol* 1519, 169-184. [10.1007/978-1-4939-6581-6\\_11](https://doi.org/10.1007/978-1-4939-6581-6_11).
- 1049 Schnettger, L., Rodgers, A., Repnik, U., Lai, R.P., Pei, G., Verdoes, M., Wilkinson, R.J.,  
1050 Young, D.B., and Gutierrez, M.G. (2017). A Rab20-Dependent Membrane Trafficking  
1051 Pathway Controls *M. tuberculosis* Replication by Regulating Phagosome Spaciousness and  
1052 Integrity. *Cell Host Microbe* 21, 619-628 e615. [10.1016/j.chom.2017.04.004](https://doi.org/10.1016/j.chom.2017.04.004).
- 1053 Scorpio, A., and Zhang, Y. (1996). Mutations in *pncA*, a gene encoding  
1054 pyrazinamidase/nicotinamidase, cause resistance to the antituberculous drug pyrazinamide  
1055 in tubercle bacillus. *Nat Med* 2, 662-667. [10.1038/nm0696-662](https://doi.org/10.1038/nm0696-662).
- 1056 Solotorovsky, M., Gregory, F.J., Ironson, E.J., Bugie, E.J., O'Neill, R.C., and Pfister, R., 3rd  
1057 (1952). Pyrazinoic acid amide; an agent active against experimental murine tuberculosis.  
1058 *Proc Soc Exp Biol Med* 79, 563-565. [10.3181/00379727-79-19447](https://doi.org/10.3181/00379727-79-19447).
- 1059 Stewart, G.R., Patel, J., Robertson, B.D., Rae, A., and Young, D.B. (2005). *Mycobacterial*  
1060 mutants with defective control of phagosomal acidification. *PLoS Pathog* 1, 269-278.  
1061 [10.1371/journal.ppat.0010033](https://doi.org/10.1371/journal.ppat.0010033).
- 1062 Sun, Q., Li, X., Perez, L.M., Shi, W., Zhang, Y., and Sacchettini, J.C. (2020). The molecular  
1063 basis of pyrazinamide activity on *Mycobacterium tuberculosis* PanD. *Nat Commun* 11, 339.  
1064 [10.1038/s41467-019-14238-3](https://doi.org/10.1038/s41467-019-14238-3).

- 1065 Takaki, K., Davis, J.M., Winglee, K., and Ramakrishnan, L. (2013). Evaluation of the  
1066 pathogenesis and treatment of *Mycobacterium marinum* infection in zebrafish. *Nat Protoc* 8,  
1067 1114-1124. 10.1038/nprot.2013.068.
- 1068 Tarshis, M.S., and Weed, W.A., Jr. (1953). Lack of significant in vitro sensitivity of  
1069 *Mycobacterium tuberculosis* to pyrazinamide on three different solid media. *Am Rev Tuberc*  
1070 67, 391-395. 10.1164/art.1953.67.3.391.
- 1071 van der Wel, N., Hava, D., Houben, D., Fluitsma, D., van Zon, M., Pierson, J., Brenner, M.,  
1072 and Peters, P.J. (2007). *M. tuberculosis* and *M. leprae* translocate from the phagolysosome  
1073 to the cytosol in myeloid cells. *Cell* 129, 1287-1298. 10.1016/j.cell.2007.05.059.
- 1074 van Wilgenburg, B., Browne, C., Vowles, J., and Cowley, S.A. (2013). Efficient, long term  
1075 production of monocyte-derived macrophages from human pluripotent stem cells under  
1076 partly-defined and fully-defined conditions. *PLoS One* 8, e71098.  
1077 10.1371/journal.pone.0071098.
- 1078 Vandal, O.H., Nathan, C.F., and Ehrt, S. (2009). Acid resistance in *Mycobacterium*  
1079 *tuberculosis*. *J Bacteriol* 191, 4714-4721. 10.1128/JB.00305-09.
- 1080 Vandal, O.H., Pierini, L.M., Schnappinger, D., Nathan, C.F., and Ehrt, S. (2008). A membrane  
1081 protein preserves intrabacterial pH in intraphagosomal *Mycobacterium tuberculosis*. *Nat Med*  
1082 14, 849-854. 10.1038/nm.1795.
- 1083 WHO (2021). Global tuberculosis report 2021.  
1084 <https://www.who.int/publications/i/item/9789240037021>.
- 1085 Zhang, Y., Permar, S., and Sun, Z. (2002). Conditions that may affect the results of  
1086 susceptibility testing of *Mycobacterium tuberculosis* to pyrazinamide. *J Med Microbiol* 51, 42-  
1087 49. 10.1099/0022-1317-51-1-42.
- 1088 Zhang, Y., Scorpio, A., Nikaido, H., and Sun, Z. (1999). Role of acid pH and deficient efflux  
1089 of pyrazinoic acid in unique susceptibility of *Mycobacterium tuberculosis* to pyrazinamide. *J*  
1090 *Bacteriol* 181, 2044-2049.
- 1091 Zhang, Y., Shi, W., Zhang, W., and Mitchison, D. (2013). Mechanisms of Pyrazinamide Action  
1092 and Resistance. *Microbiol Spectr* 2, 1-12. 10.1128/microbiolspec.MGM2-0023-2013.
- 1093 Zhang, Y., Wade, M.M., Scorpio, A., Zhang, H., and Sun, Z. (2003). Mode of action of  
1094 pyrazinamide: disruption of *Mycobacterium tuberculosis* membrane transport and energetics  
1095 by pyrazinoic acid. *J Antimicrob Chemother* 52, 790-795. 10.1093/jac/dkg446.
- 1096



# Figure 1

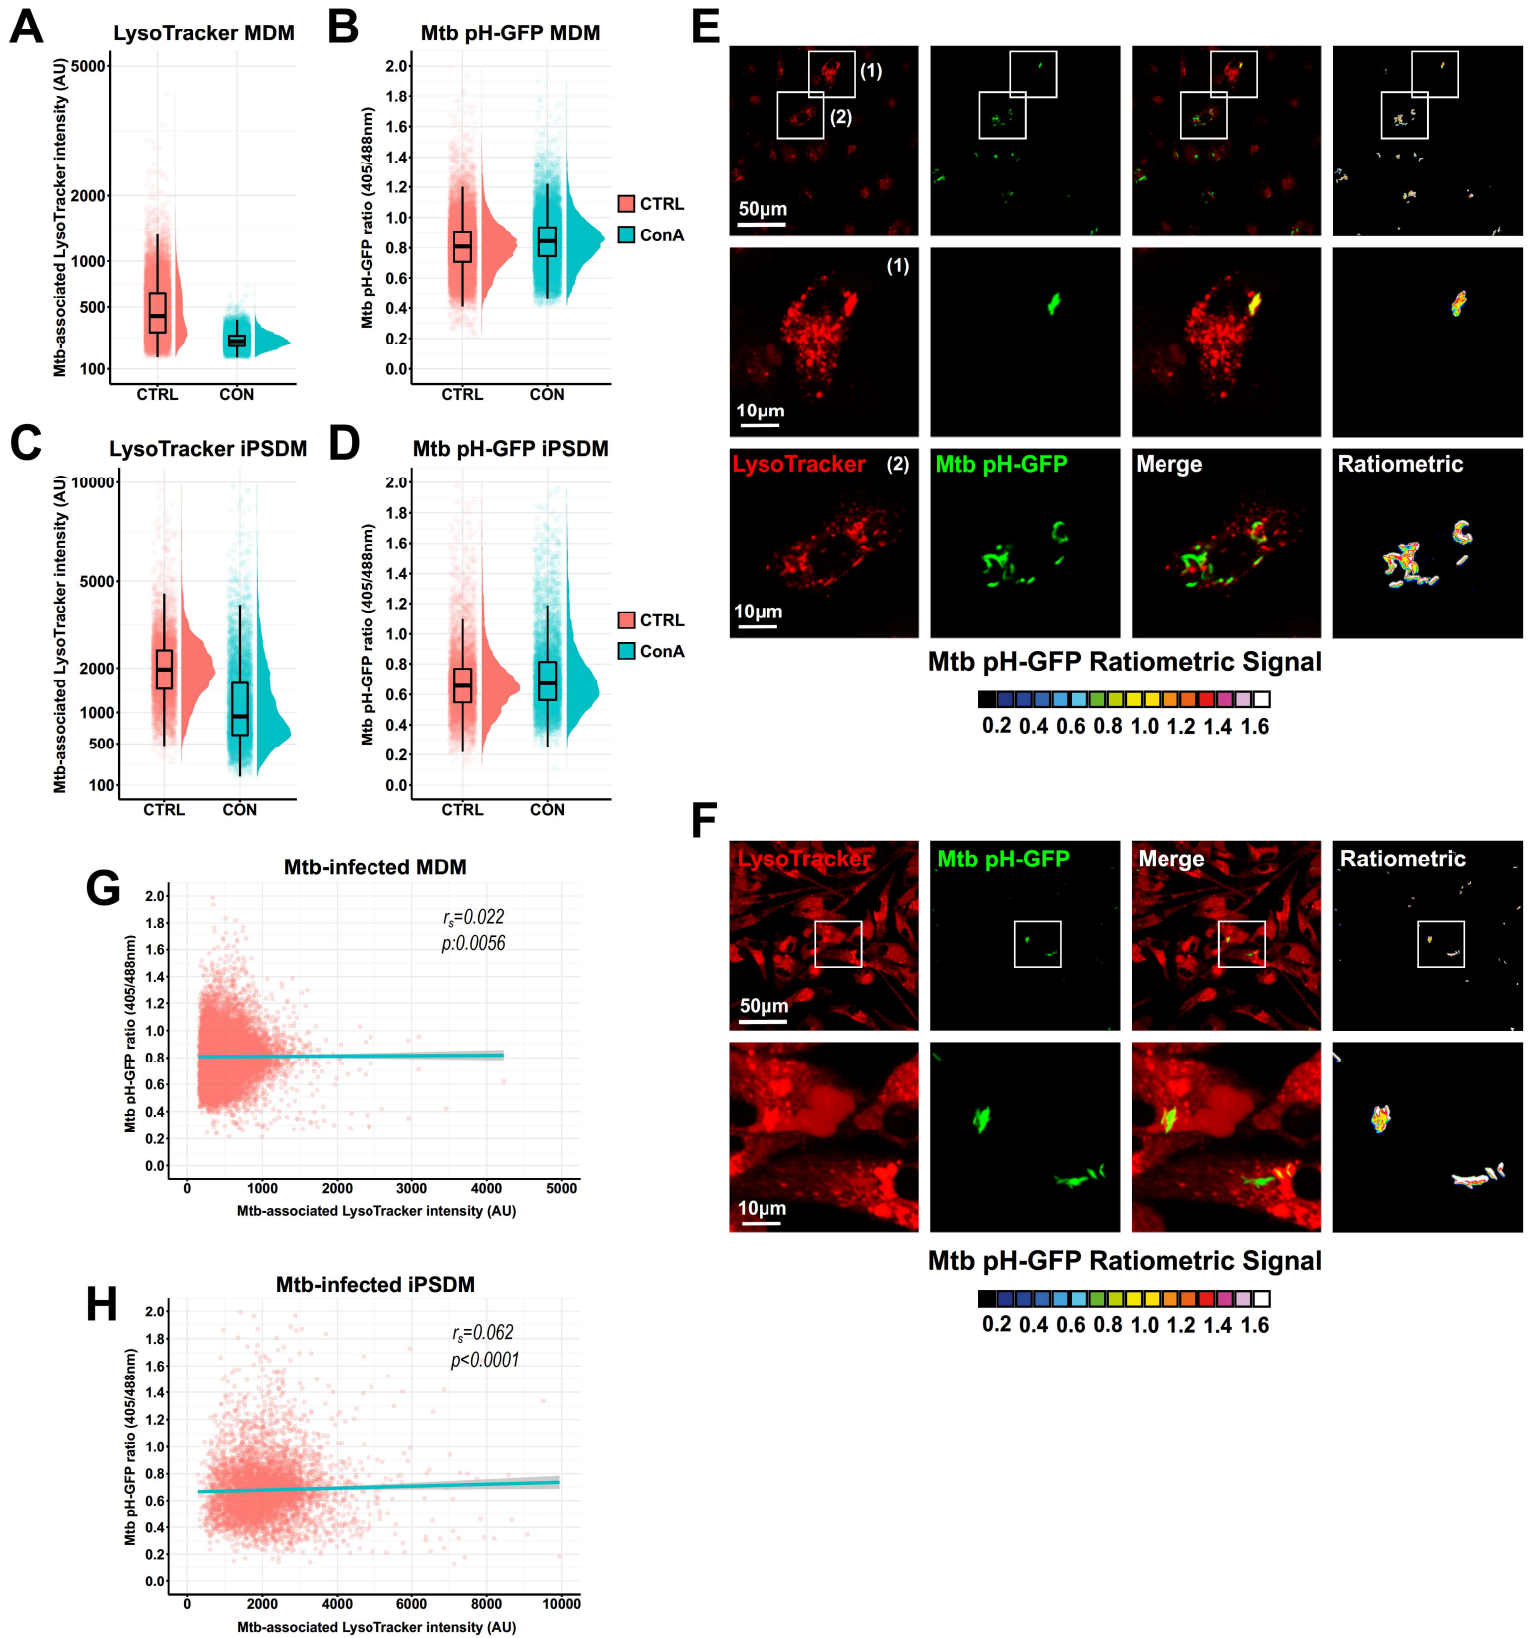

## Figure 2

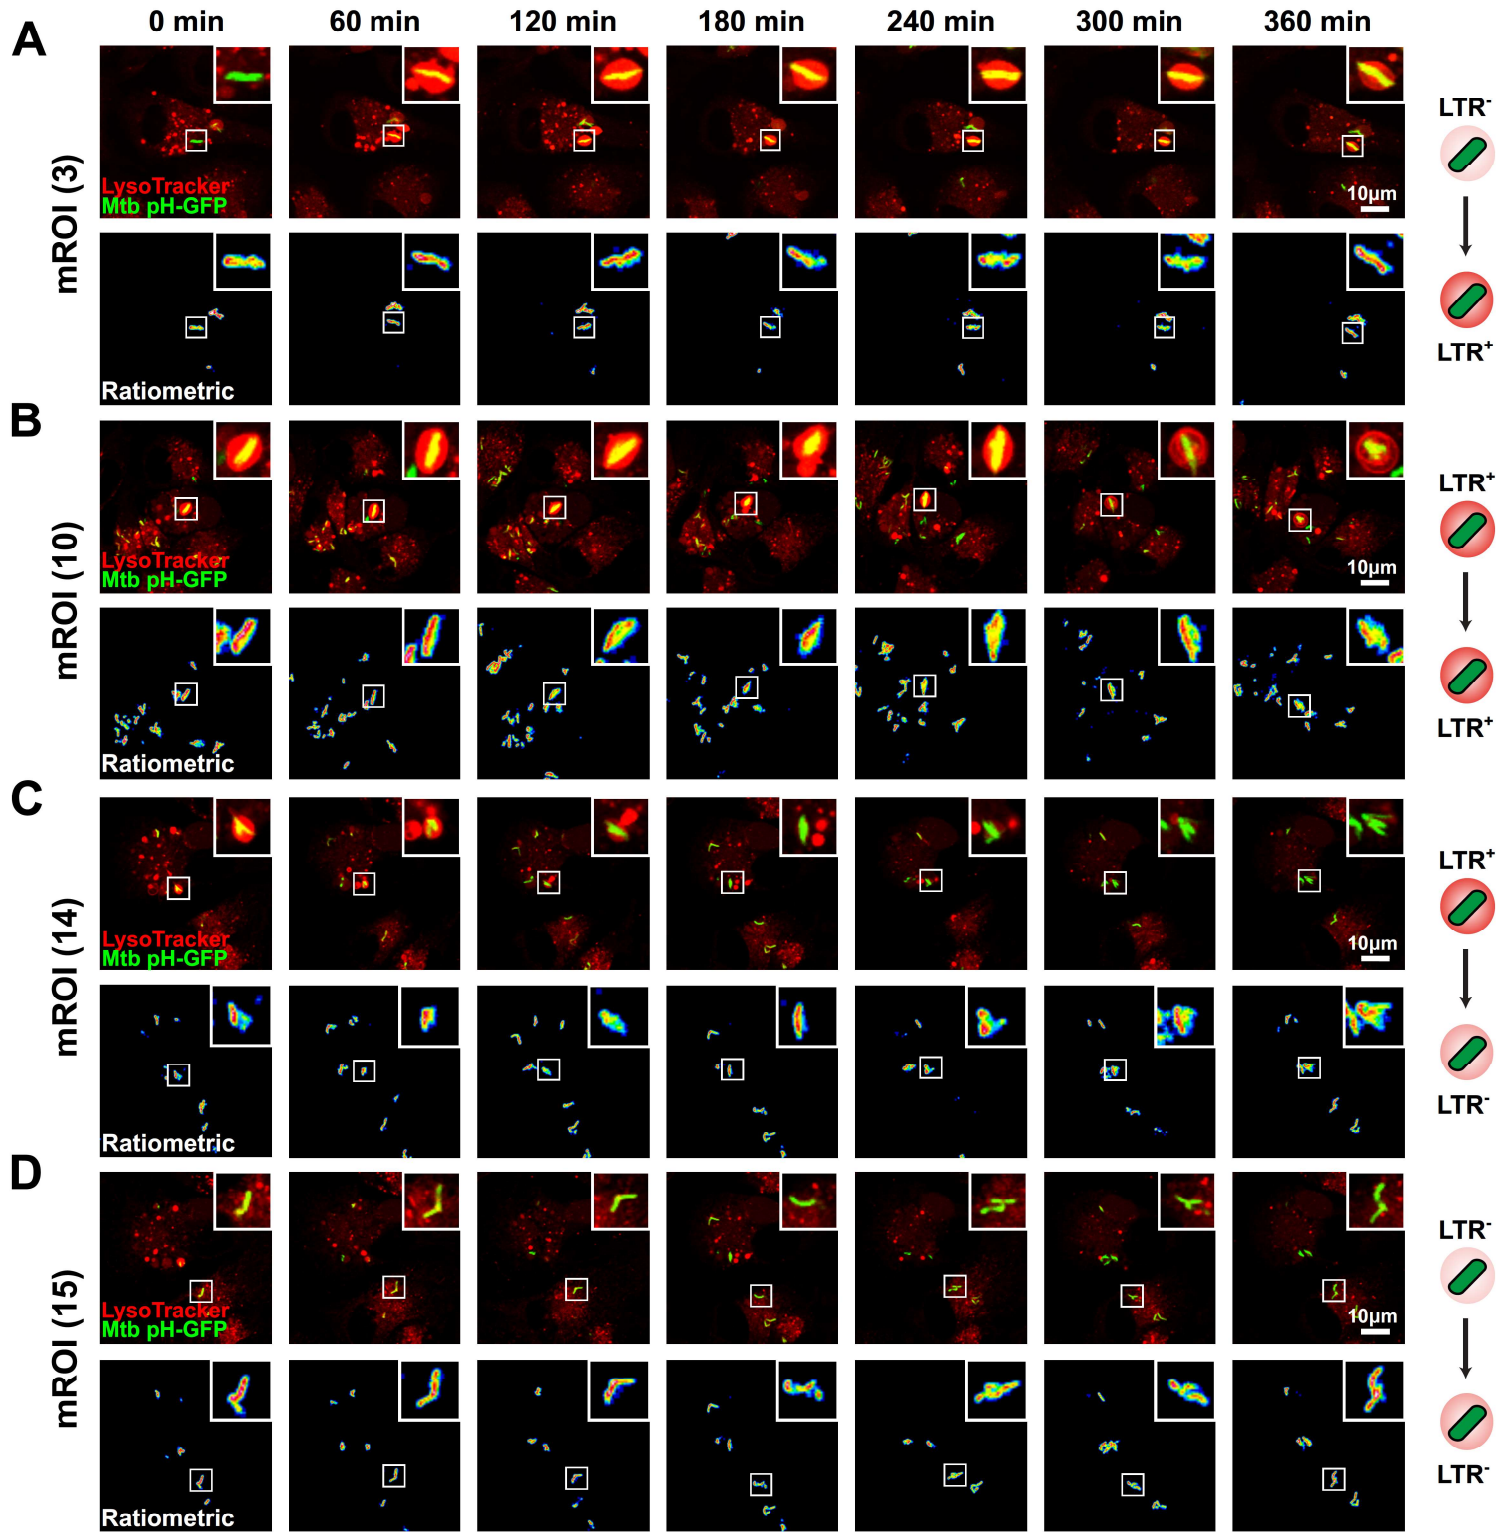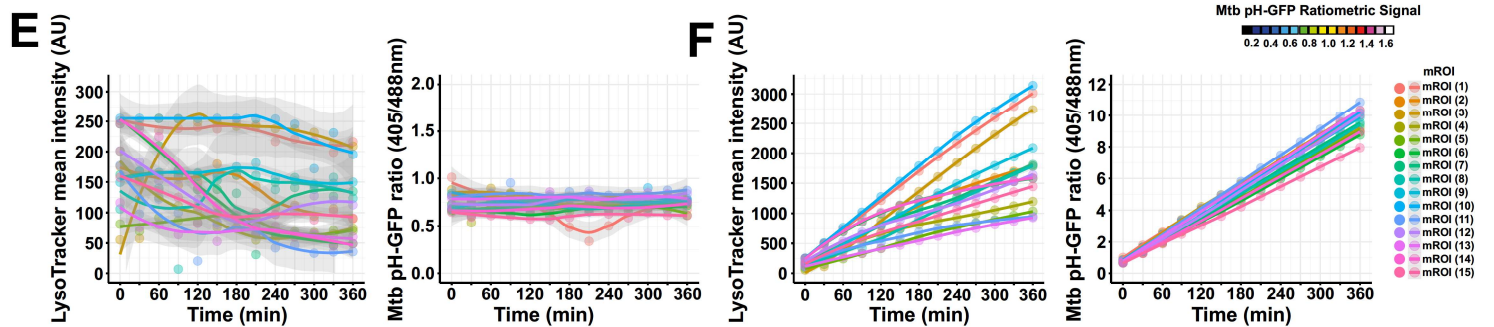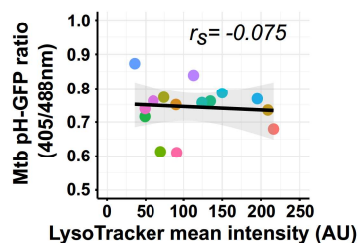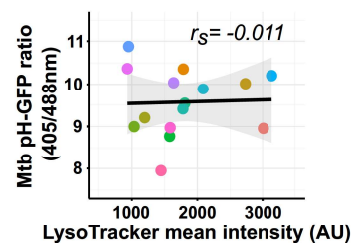



# Figure 3

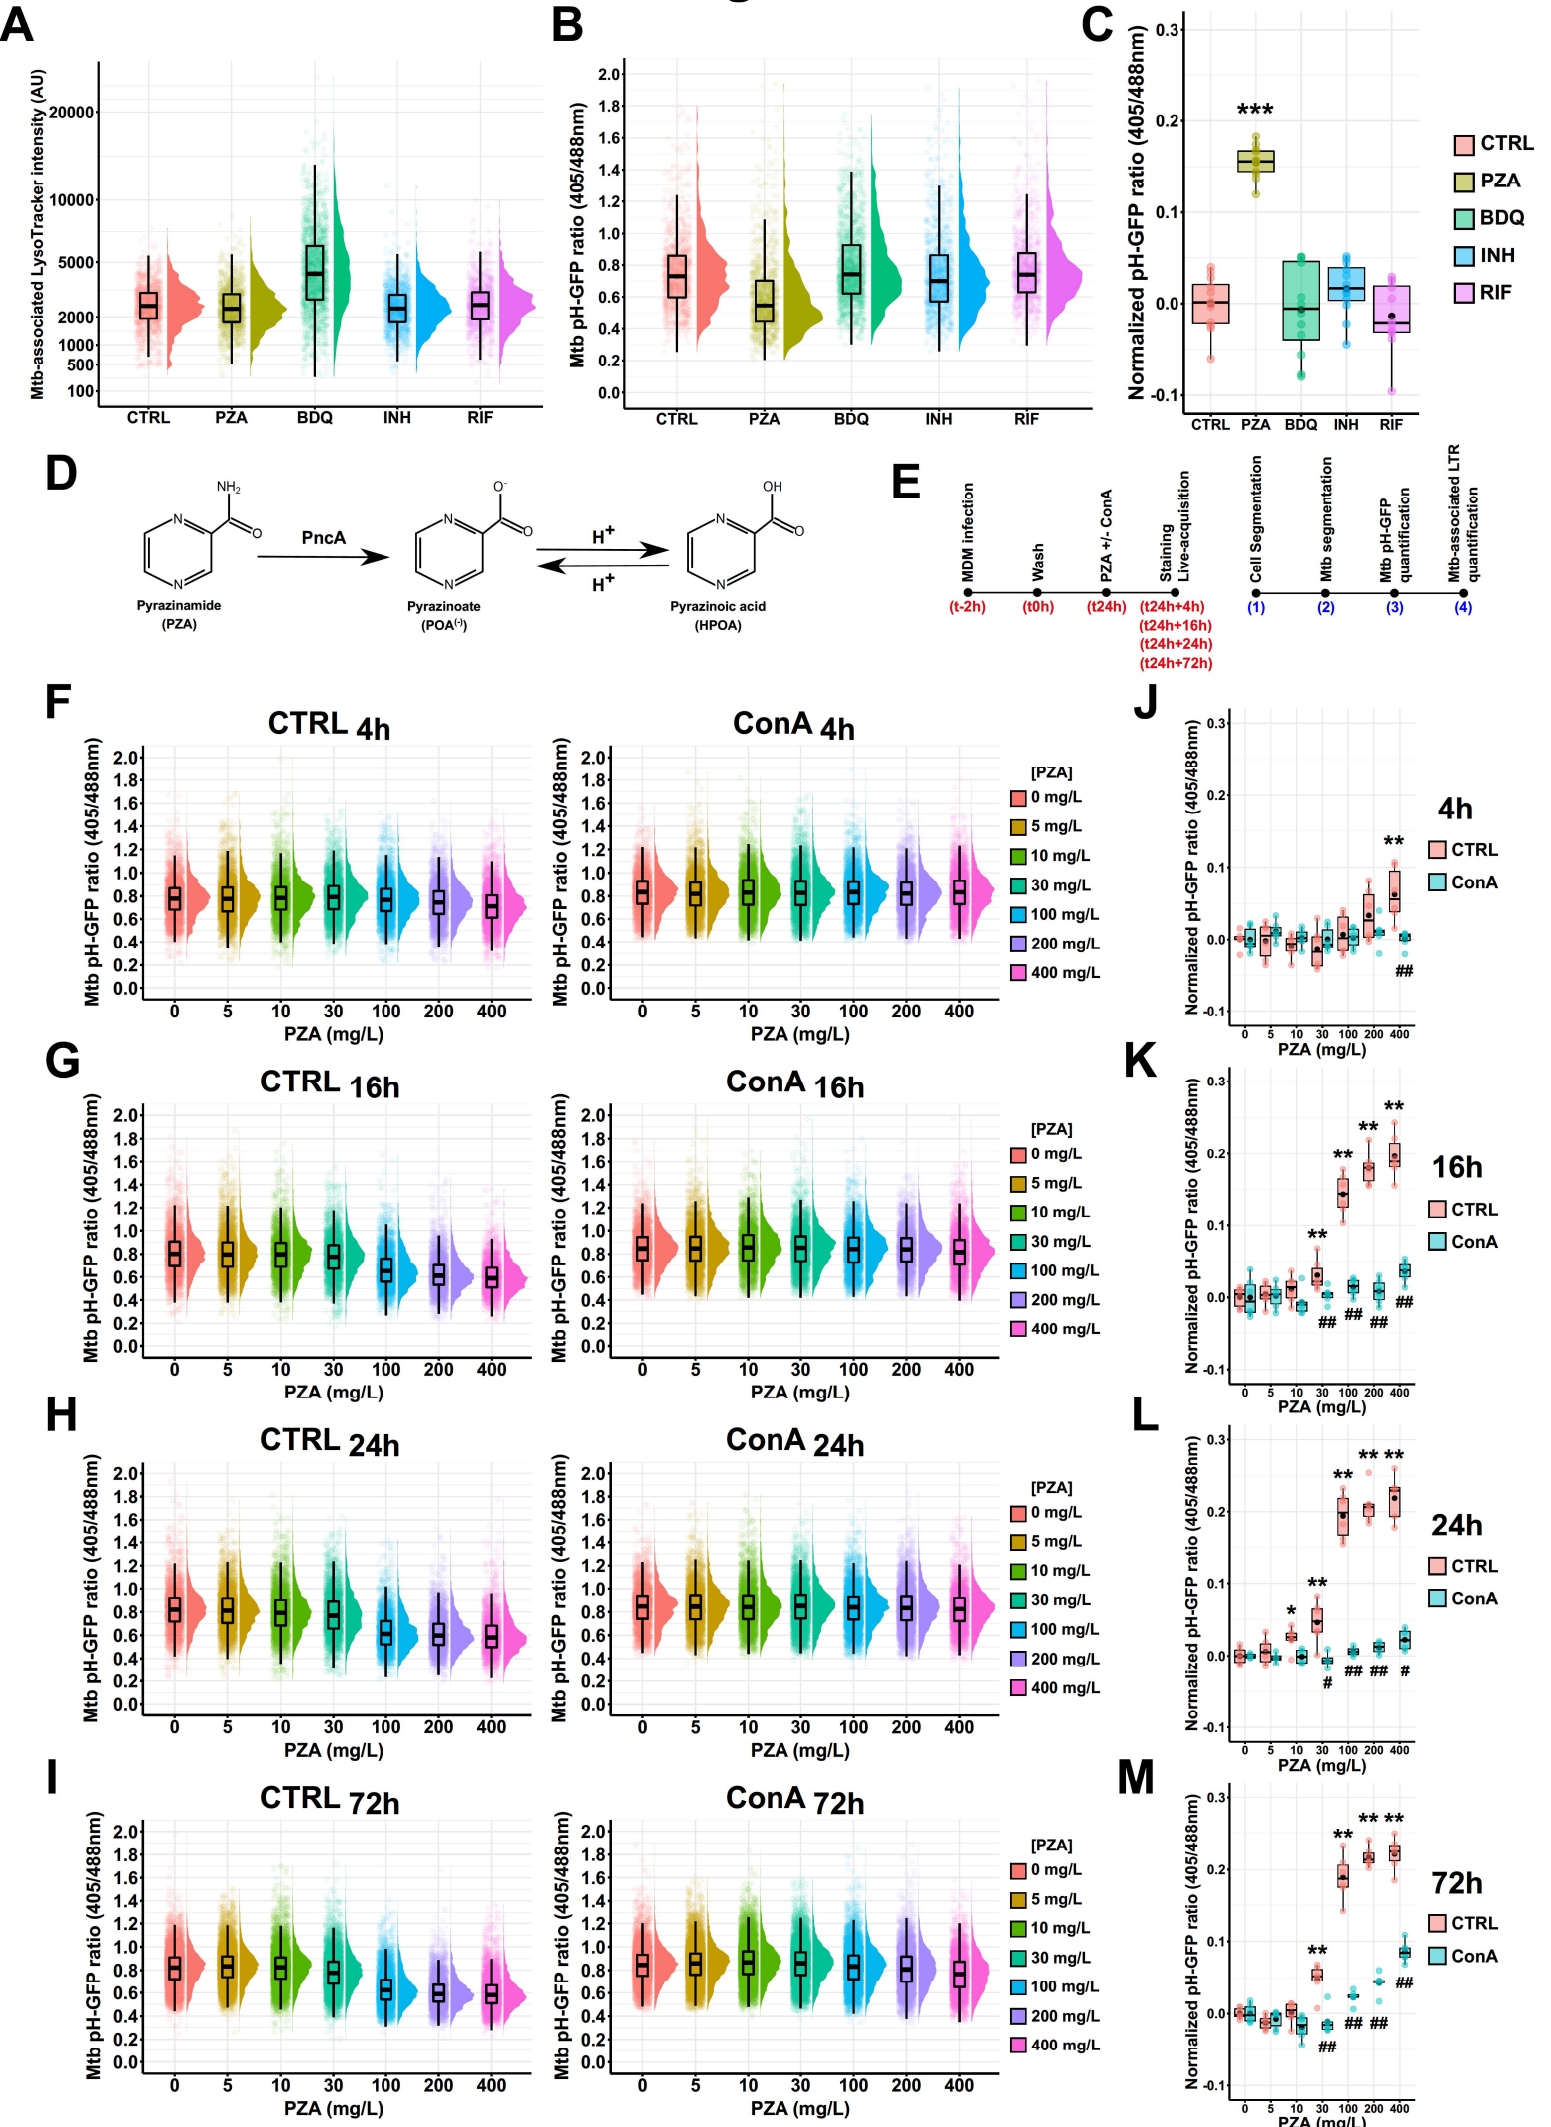



## Figure 4

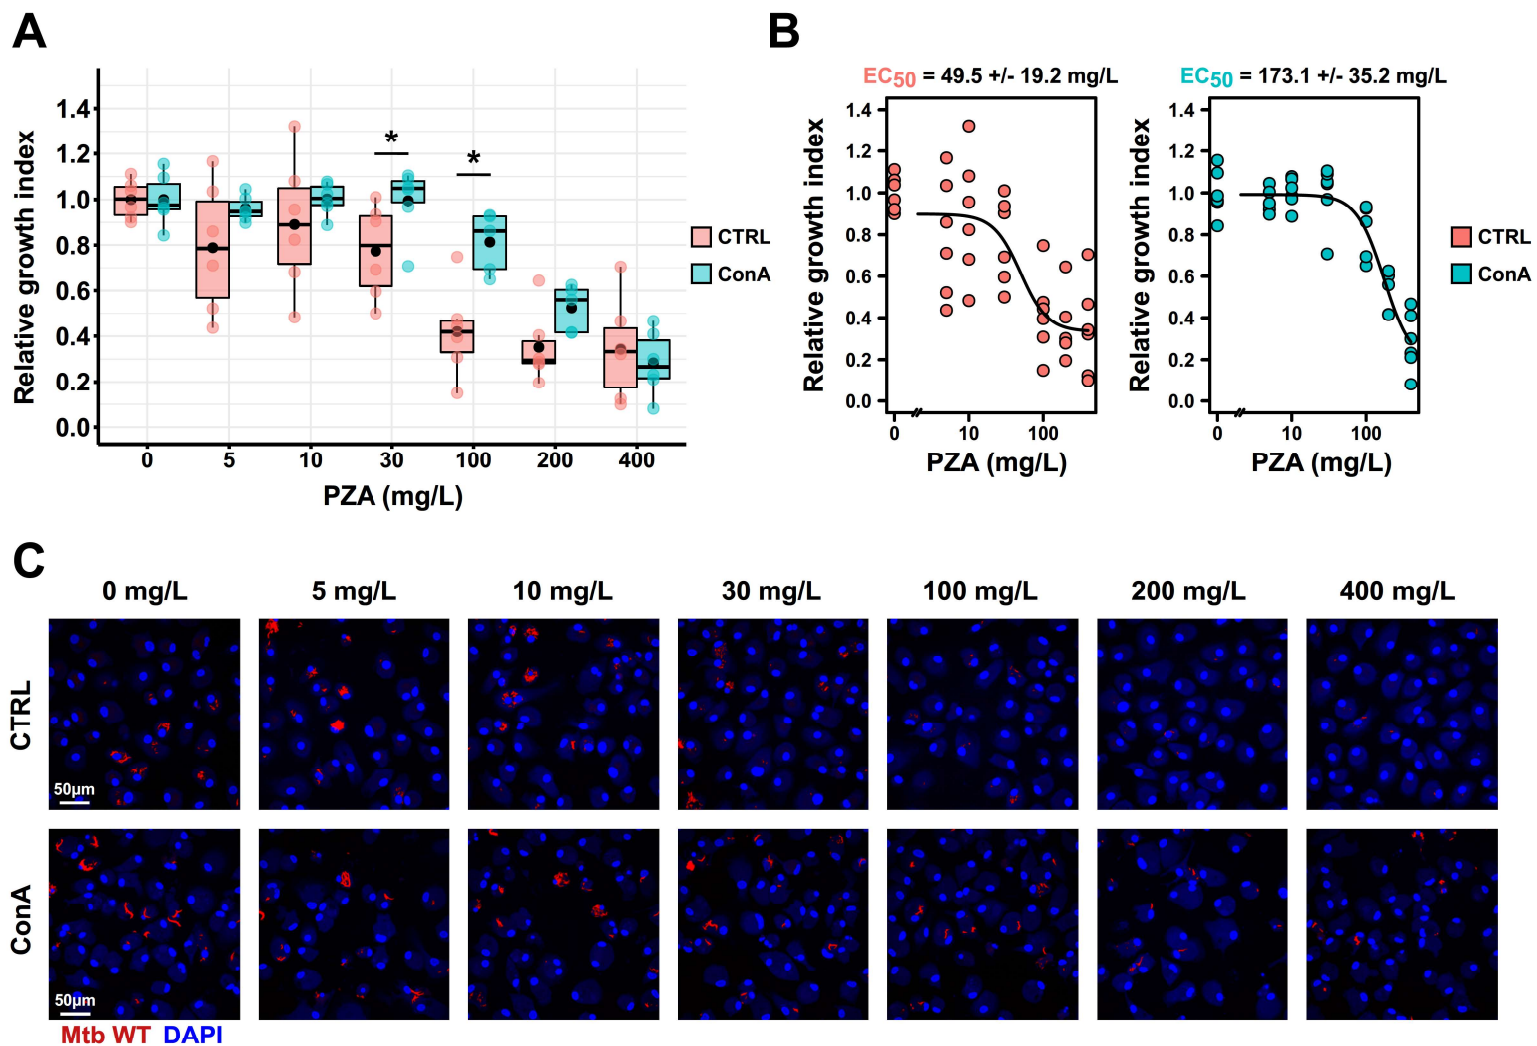

**Figure 5**

**A**

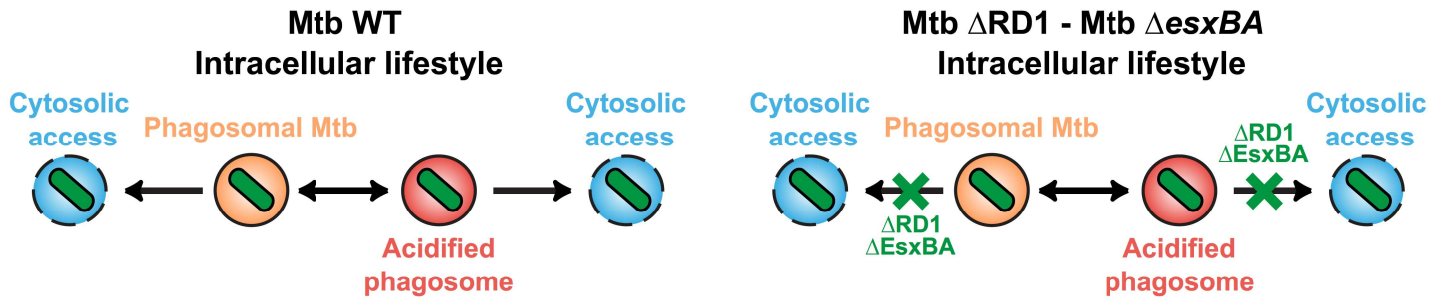

**B**

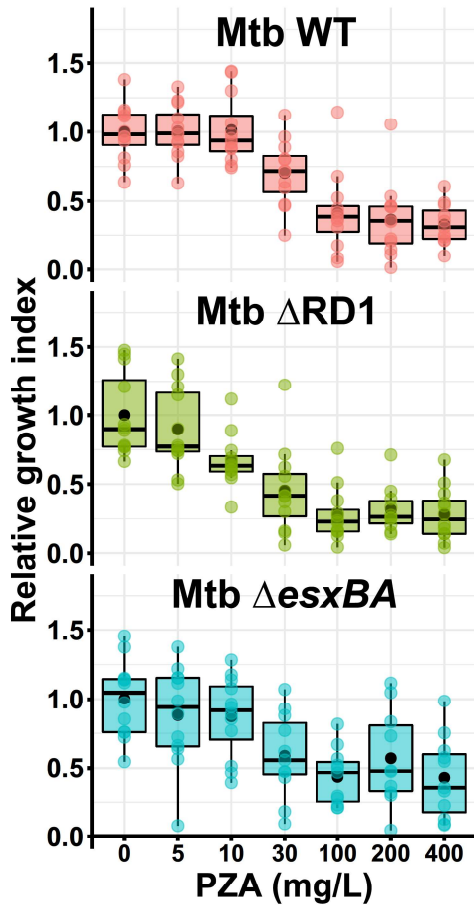

**C**

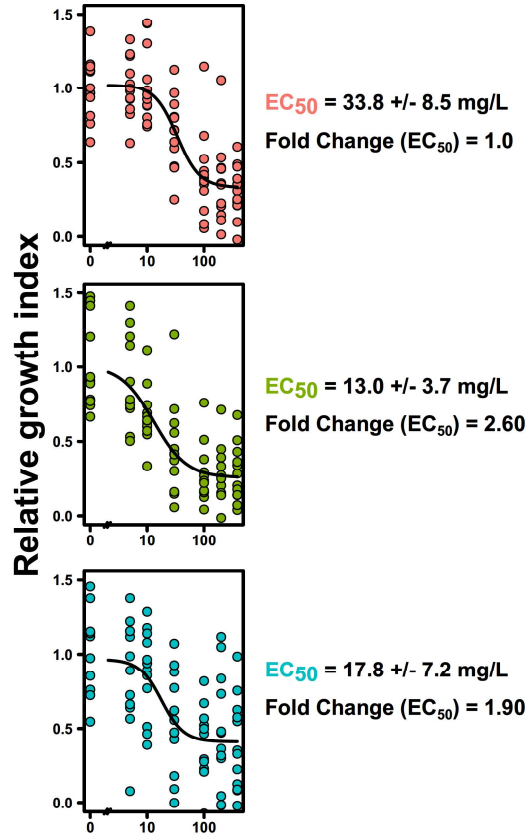

**E**

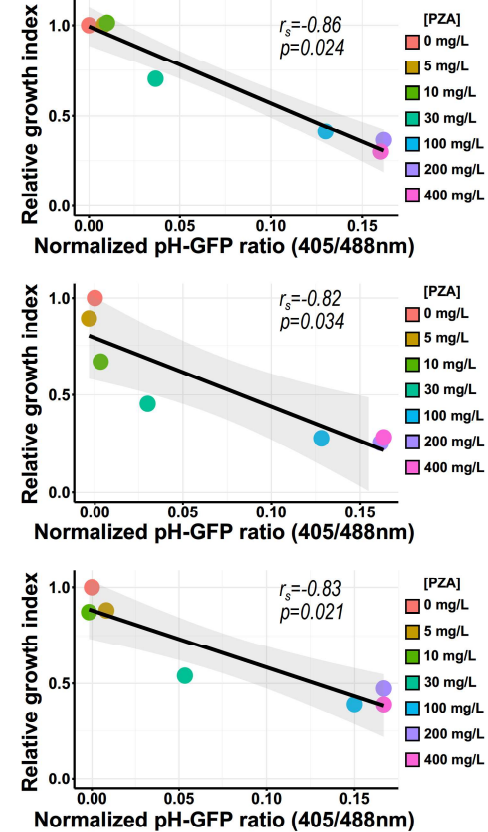

**D**

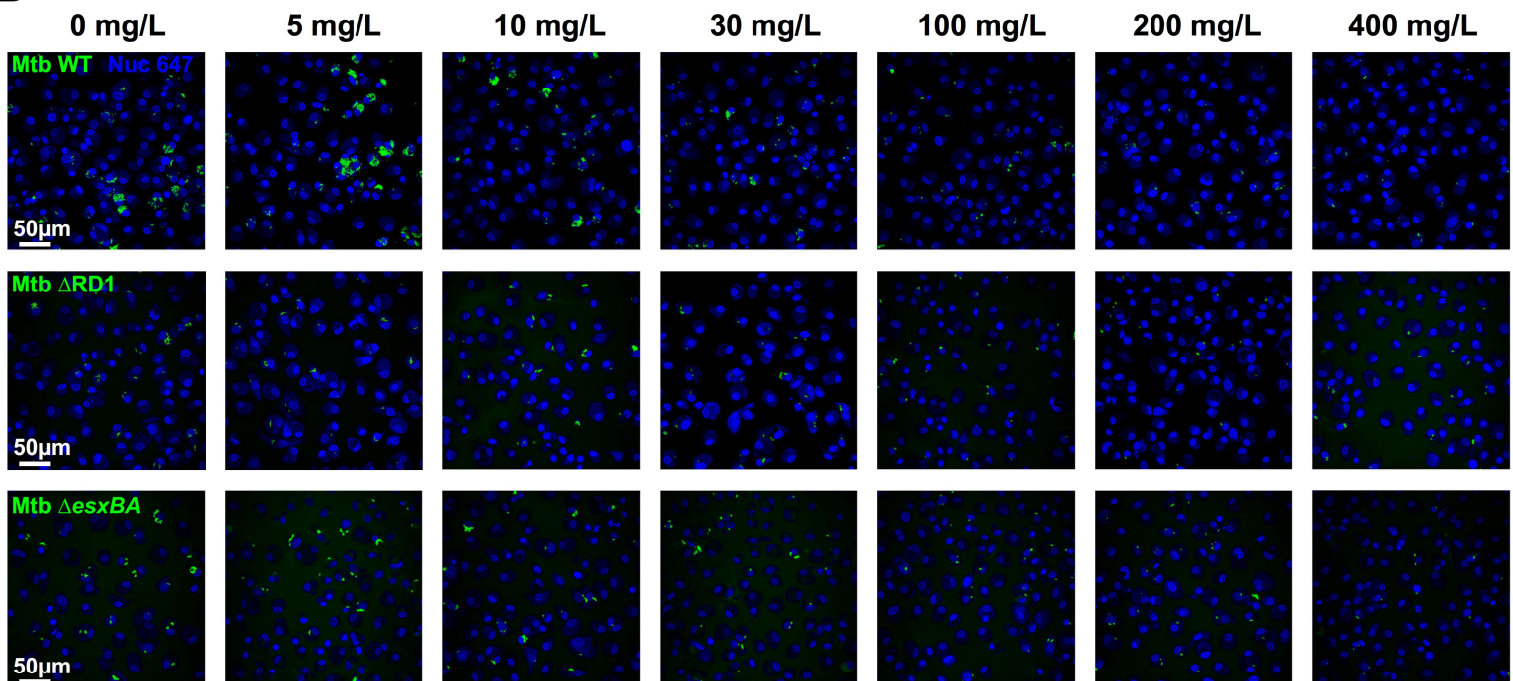

## Figure 6

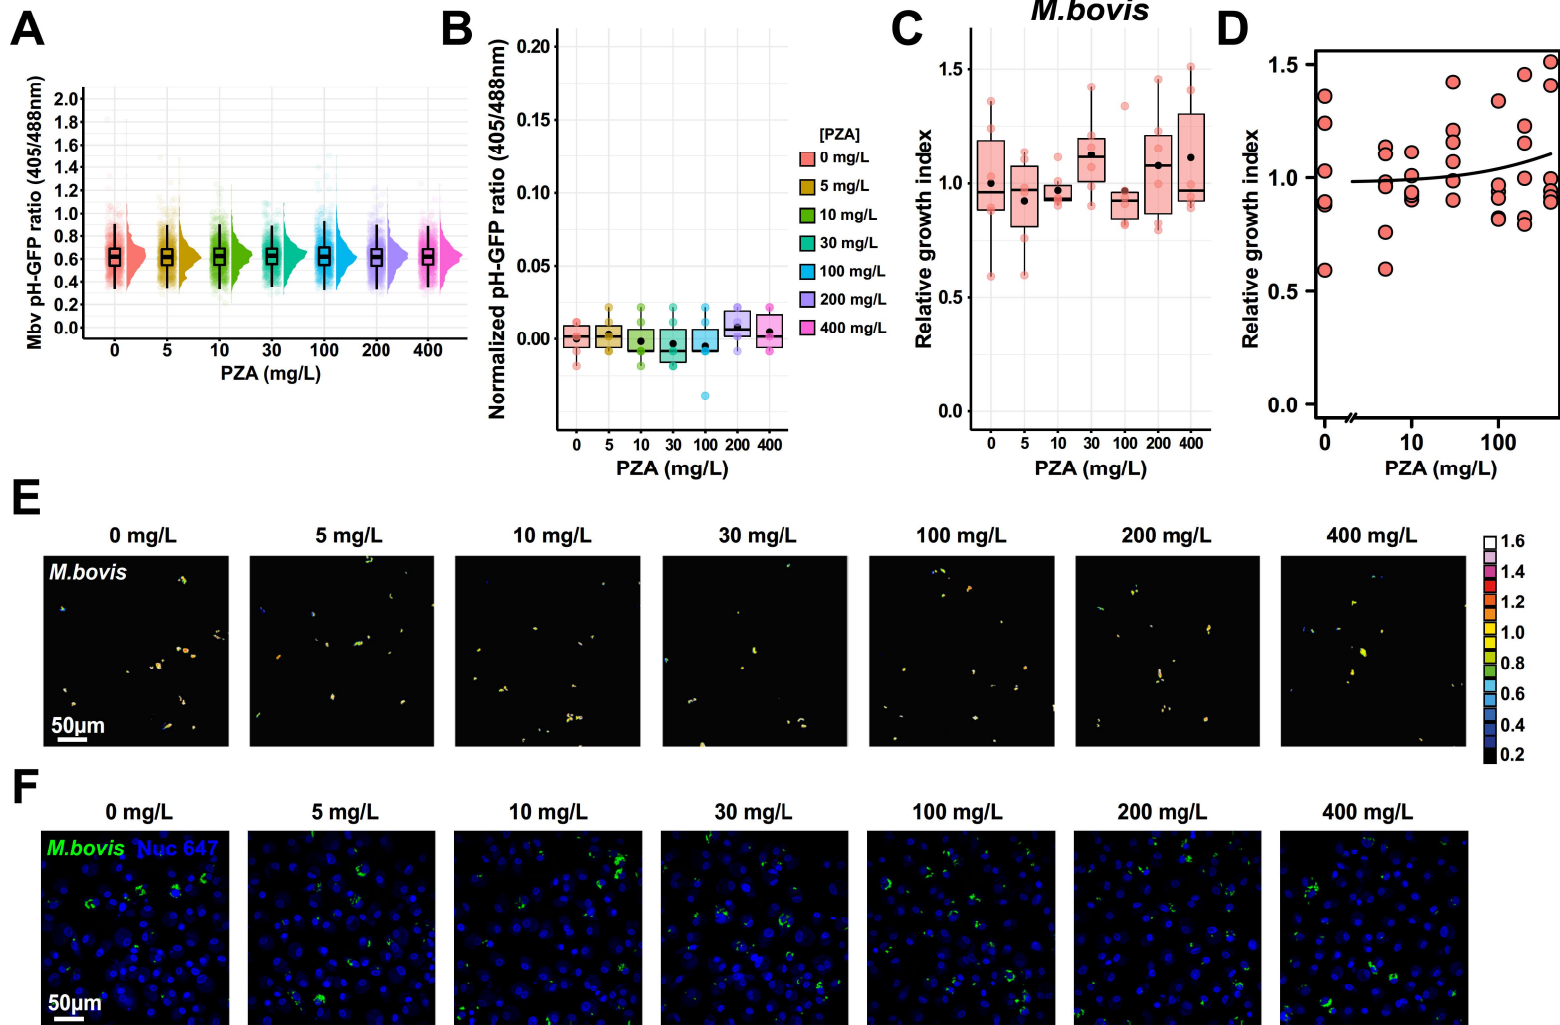

Source: http://biorxiv.org/content/10.1101/2021.12.20.473466v1.full.pdf
